# Supplementary material for: Novel Marine Secondary Metabolites Worthy of Development as Anticancer Agents: A Review
Source: MDPI journal article supplement (doi:10.3390/molecules26195769), 2021-09-23
Supplement: s1 [file s1]

## Supplementary Materials

# Novel Marine Secondary Metabolites Worthy of Development as Anticancer Agents: A Review

Florence Nwakaego Mbaoji <sup>1,2,3</sup>, Justus Amuche Nweze <sup>1,4,5,6</sup>, Liyan Yang <sup>7</sup>, Yangbin Huang <sup>1</sup>, Shushi Huang <sup>1</sup>, Akachukwu Marytheresa Onwuka <sup>3</sup>, Ikechukwu Emmanuel Peter <sup>3</sup>, Cynthia Chioma Mbaoji <sup>3</sup>, Mingguo Jiang <sup>8</sup>, Yunkai Zhang <sup>2,\*</sup>, Lixia Pan <sup>7,\*</sup> and Dengfeng Yang <sup>1,\*</sup>

<sup>1</sup> Guangxi Key Laboratory of Marine Natural Products and Combinatorial Biosynthesis Chemistry, Guangxi Beibu Gulf Marine Research Center, Guangxi Academy of Sciences, Nanning 530007, China; florence.mbaoji@unn.edu.ng (F.N.M.); justus.nweze@unn.edu.ng (J.A.N.); yangbinhuang106@163.com (Y. H.); hshushi@gxas.cn (S.H.)

<sup>2</sup> College of Life Science and Technology of Guangxi University, Nanning 530004, China

<sup>3</sup> Department of Pharmacology and Toxicology, Faculty of Pharmaceutical Sciences, University of Nigeria, Nsukka 410001, Enugu State, Nigeria; akachukwu.onwuka@unn.edu.ng (A.M.O.); ikechukwu.peter@unn.edu.ng (I.E.P.); cynthia.mbaoji.194479@unn.edu.ng (C.C.M.)

<sup>4</sup> Department of Science Laboratory Technology, Faculty of Physical Sciences, University of Nigeria, Nsukka 410001, Enugu State, Nigeria

<sup>5</sup> Department of Ecosystem Biology, Faculty of Science, University of South Bohemia in Ceske Budejovice, 37001 Ceske Budejovice, Czech Republic

<sup>6</sup> Soil and Water Research Infrastructure, Biology Centre, Czech Academy of Sciences, 10000 Prague, Czech Republic

<sup>7</sup> Guangxi Biomass Industrialization Engineering Institute, National Engineering Research Center of Non-food Biorefinery, State Key Laboratory of Non-Food Biomass, Guangxi Academy of Sciences, Nanning 530007, China; yangliyan.1988@163.com

<sup>8</sup> Guangxi Key Laboratory for Polysaccharide Materials and Modifications, School of Marine Sciences and Biotechnology, Guangxi University for Nationalities, Nanning 530008, China; mzyjjiang@163.com

\* Correspondence: yykzhang@gxu.edu.cn (Y.Z.); panlixia10@163.com (L.P.); dengfengyang@163.com (D.Y.); Tel: +86-771-2503980 (L.P.); +86-771-2536109 (D.Y.)

## Table of Contents

| S/N | Title                                                                                                       | Page |
|-----|-------------------------------------------------------------------------------------------------------------|------|
| S1  | The IC <sub>50</sub> of marine derived alkaloids with anticancer activity                                   | 3    |
| S2  | The IC <sub>50</sub> of marine-derived terpenes and terpenoids with anticancer activity                     | 8    |
| S3  | The IC <sub>50</sub> of marine-derived amino acids, peptides, and polyketides with anticancer activity      | 13   |
| S4  | The IC <sub>50</sub> of marine-derived lipids, sterols and steroids with anticancer activity                | 19   |
| S5  | The IC <sub>50</sub> of marine-derived ketones, quinines, quinolones and xanthones with anticancer activity | 21   |
| S6  | The IC <sub>50</sub> of other marine-derived compounds with anticancer activity                             | 22   |

**Table S1.** The IC<sub>50</sub> of marine derived alkaloids with anticancer activity

| S/N | Isolated Compounds                                                        | Class                                     | Status             | Source                                                                                                                                        | Year | Cancer cell line                                                                                                                                                                                                                                                                                                                                                             | Cancer Source | IC <sub>50</sub> (μM)                                                                  | Ref. |
|-----|---------------------------------------------------------------------------|-------------------------------------------|--------------------|-----------------------------------------------------------------------------------------------------------------------------------------------|------|------------------------------------------------------------------------------------------------------------------------------------------------------------------------------------------------------------------------------------------------------------------------------------------------------------------------------------------------------------------------------|---------------|----------------------------------------------------------------------------------------|------|
| 1.  | Subereamolline D (Cpd. 1)                                                 | Bromotyrosine-derived alkaloids           | Novel              | Sea sponge <i>Fascaplysinopsis reticulata</i> from Xisha Islands in the south China                                                           | 2019 | Jurkat cell ( <i>T-cell leukaemia</i> )                                                                                                                                                                                                                                                                                                                                      | Human         | 0.88                                                                                   | 37   |
| 2.  | N-glutarylchaetoviridin A (Cpd. 2)<br>N-glutarylchaetoviridin C ( Cpd. 4) | Glutamine-containing Azaphilone Alkaloids | Novel (Cpds. 2, 4) | Deep-Sea-Derived Fungus <i>Chaetomium globosum</i> HDN151398, a fungus isolated from a deep-sea sediment sample collected in South China Sea. | 2019 | HL-60 ( <i>leukaemia</i> )<br>HL-60 ( <i>leukaemia</i> )<br>K562 ( <i>rhabdomyoma</i> )<br>BEL-7402 ( <i>hepatoma</i> )<br>HCT-116 ( <i>colon</i> )<br>L-02 ( <i>hepatic</i> )<br>MGC-803 ( <i>gastric</i> )<br>HO8910 ( <i>ovary</i> )<br>( <i>neuroblastoma</i> )<br>NCIH1975 ( <i>lung adenocarcinoma</i> )<br>U87 ( <i>glioblastoma</i> )<br>MDA-MB-231( <i>breast</i> ) | All human     | 10.3<br>11.1<br>11.7<br>10.9<br>11.3<br>18.2<br>6.6<br>9.7<br><br>11.2<br>18.3<br>13.2 | 38   |
|     | Chaetomugilin A (Cpd. 5)                                                  |                                           | Known (Cpds. 5, 6) |                                                                                                                                               |      | HL-60 ( <i>leukaemia</i> )<br>K562 ( <i>rhabdomyoma</i> )<br>BEL-7402 ( <i>hepatoma</i> )<br>HCT-116 ( <i>colon</i> )<br>L-02 ( <i>hepatic</i> )<br>MGC-803 ( <i>gastric</i> )<br>HO8910 ( <i>ovary</i> )                                                                                                                                                                    |               | 6.4<br>11.1<br>17.9<br>6.1<br>15.2<br>15.3<br>12.1<br>18.3                             |      |

|    |                                                                                                                                                                                                      |                                        |                              |                                                                                                    |      |                                                                                                                                                                                                                                                                                                                                                                                                                                                                                                                           |           |                                                                                                                                                                                                                               |    |
|----|------------------------------------------------------------------------------------------------------------------------------------------------------------------------------------------------------|----------------------------------------|------------------------------|----------------------------------------------------------------------------------------------------|------|---------------------------------------------------------------------------------------------------------------------------------------------------------------------------------------------------------------------------------------------------------------------------------------------------------------------------------------------------------------------------------------------------------------------------------------------------------------------------------------------------------------------------|-----------|-------------------------------------------------------------------------------------------------------------------------------------------------------------------------------------------------------------------------------|----|
|    | Chaetomugilin C (Cpd. 6)                                                                                                                                                                             |                                        |                              |                                                                                                    |      | NCIH1975 (lung)<br>HL-60 (leukaemia)<br>K562 (rhabdomyoma)<br>BEL-7402 (hepatoma)<br>HCT-116 (colon)<br>HeLa (cervical)<br>L-02 (hepatic)<br>MGC-803 (gastric)<br>HO8910 (ovary)<br>SHSY5Y<br>(neuroblastoma)<br>NCIH1975 (lung)<br>U87 (glioblastoma)                                                                                                                                                                                                                                                                    |           | 6.6<br>12.3<br>16.8<br>5.7<br>13.2<br>9.1<br>9.6<br>8.8<br>19.4<br>12.1<br>17.6                                                                                                                                               |    |
| 3. | Monanchoxymycalin C (Cpd. 12)                                                                                                                                                                        | Pentacyclic guanidine alkaloid         | Novel                        | Marine sponge <i>Monanchora pulchra</i> collected off the coast of Chirpoi Island                  | 2019 | HELa (cervical)                                                                                                                                                                                                                                                                                                                                                                                                                                                                                                           | Human     | 3.5                                                                                                                                                                                                                           | 39 |
| 4. | Araguspongine C (Cpd. 14)<br><br>Meso-araguspongine C (Cpd. 15)<br><br>Araguspongine N (Cpd. 18)<br><br>Araguspongines O (Cpd. 19)<br><br>Araguspongine P (Cpd. 20)<br><br>Araguspongine A (Cpd. 13) | Macrocyclic bis-quinolizidine alkaloid | Novel (Cpd. 15) others known | Marine sponge <i>Xestospongia muta</i> collected at the coral reef of Vinh Moc, Quang Tri, Vietnam | 2019 | HepG-2 (liver)<br>HL-60 (leukaemia)<br>LU-1 (lung)<br>MCF-7 (breast)<br>SK-MEL-2 (Skin)<br>HepG-2 (liver)<br>HL-60 (leukaemia)<br>LU-1 (lung) | All human | 0.75<br>0.88<br>0.96<br>0.79<br>1.02<br>0.43<br>0.62<br>0.76<br>0.44<br>0.77<br>6.58<br>7.84<br>9.20<br>7.36<br>11.23<br>5.06<br>5.65<br>5.63<br>5.32<br>5.45<br>5.55<br>6.58<br>5.84<br>5.68<br>6.24<br>6.85<br>9.19<br>9.88 | 40 |

|    |                             |                       |           |                                                                                                                                                         |      |                                                                                                                                                                                                                                                                                         |           |                                                             |    |
|----|-----------------------------|-----------------------|-----------|---------------------------------------------------------------------------------------------------------------------------------------------------------|------|-----------------------------------------------------------------------------------------------------------------------------------------------------------------------------------------------------------------------------------------------------------------------------------------|-----------|-------------------------------------------------------------|----|
|    |                             |                       |           |                                                                                                                                                         |      | MCF-7 (breast)<br>SK-MEL-2 (Skin)                                                                                                                                                                                                                                                       |           | 7.82<br>7.51                                                |    |
| 5. | Ascomylactam A (Cpd. 23)    | Macrocyclic alkaloids | All novel | Fungus CYSK-4 isolated from a marine semi mangrove <i>Pluchea indica</i> collected from Shankou Mangrove Nature Reserve in Guangxi Province, China      | 2019 | MDA-MB-435 (melanoma)<br>MDA-MB-231 (breast)<br>SNB19 (glioblastoma)<br>HCT116 (colon)<br>NCI-H460 (lung)<br>PC-3 (prostate)                                                                                                                                                            | All human | 4.9<br>5.9<br>6.8<br>5.5<br>4.4<br>5.7                      | 41 |
|    | Ascomylactam B (Cpd. 24)    |                       |           |                                                                                                                                                         |      | MDA-MB-435 (melanoma)<br>MDA-MB-231 (breast)<br>SNB19 (glioblastoma)<br>HCT116 (colon)<br>NCI-H460 (lung)<br>PC-3 (prostate)                                                                                                                                                            |           | 12<br>6.6<br>18<br>4.5<br>13<br>20                          |    |
|    | Ascomylactam C (Cpd. 25)    |                       |           |                                                                                                                                                         |      | MDA-MB-435 (melanoma)<br>MDA-MB-231 (breast)<br>SNB19 (glioblastoma)<br>HCT116 (colon)<br>NCI-H460 (lung)<br>PC-3 (prostate)                                                                                                                                                            |           | 7.8<br>5.1<br>7.8<br>4.2<br>4.4<br>7.5                      |    |
| 6. | Chaetoglobosins E (Cpd. 33) | Alkaloids             | Known     | <i>Chaetomium globosum</i> C2F17 isolated from a coral <i>Pocillopora damicornis</i> collected from the seashore near Sanya Bay, Hainan Province, China | 2020 | K562 (chronic myelogenous leukaemia)<br>A549 (lung adenocarcinoma)<br>Huh7 (hepatocarcinoma)<br>H1975 (lung adenocarcinoma)<br>MCF-7 (breast carcinoma)<br>U937 (lymphocytic leukemia)<br>BGC823 (gastric adenocarcinoma)<br>HL60 (promyelocytic leukemia)<br>Hela (cervical carcinoma) | All human | 8.9<br>5.9<br>1.4<br>9.2<br>2.1<br>1.4<br>8.2<br>2.5<br>2.8 | 42 |

6

|  |                                          |  |  |  |  |                                                              |       |  |
|--|------------------------------------------|--|--|--|--|--------------------------------------------------------------|-------|--|
|  |                                          |  |  |  |  | A673 ( <i>rhabdomyoma cell line</i> )                        | 8.67  |  |
|  |                                          |  |  |  |  | U87 ( <i>glioblastoma cell line</i> )                        | 9.62  |  |
|  |                                          |  |  |  |  | A549 ( <i>lung</i> )                                         | 6.10  |  |
|  |                                          |  |  |  |  | N87 ( <i>gastric carcinoma</i> )                             | 7.14  |  |
|  |                                          |  |  |  |  | H1299 ( <i>non-small cell lung carcinoma</i> )               | 11.32 |  |
|  |                                          |  |  |  |  | HUCCT1 ( <i>bile duct carcinoma</i> )                        | 11.22 |  |
|  |                                          |  |  |  |  | B16F10 ( <i>highly metastatic mouse melanoma cell line</i> ) |       |  |
|  |                                          |  |  |  |  | Karpas299 ( <i>T cell lymphoma</i> )                         | 5.89  |  |
|  | Ochrazepine B (Cpd. <b>86</b> )          |  |  |  |  | U251( <i>glioblastoma</i> )                                  | 9.91  |  |
|  | Ochrazepine C (Cpd. <b>87</b> )          |  |  |  |  | A673 ( <i>rhabdomyoma cell line</i> )                        | 8.24  |  |
|  |                                          |  |  |  |  | U87 ( <i>glioblastoma cell line</i> )                        | 9.04  |  |
|  |                                          |  |  |  |  | Hep3B ( <i>liver cancer</i> )                                | 10.28 |  |
|  | Ochrazepine D (Cpd. <b>88</b> )          |  |  |  |  | U251 ( <i>glioblastoma cell line</i> )                       | 8.26  |  |
|  | 2-hydroxycircumdatin C (Cpd. <b>89</b> ) |  |  |  |  | U251 ( <i>glioblastoma cell line</i> )                       | 8.95  |  |
|  | Aspyrone (Cpd. <b>90</b> )               |  |  |  |  | U251 ( <i>glioblastoma cell line</i> )                       | 2.54  |  |
|  |                                          |  |  |  |  | MV-4-11 ( <i>biphenotypic B myelomonocytic leukemia</i> )    |       |  |
|  |                                          |  |  |  |  | K562 ( <i>erythroleukemic cell line</i> )                    | 5.22  |  |
|  |                                          |  |  |  |  | A673 ( <i>rhabdomyoma cell line</i> )                        | 8.55  |  |
|  |                                          |  |  |  |  | N87 ( <i>gastric carcinoma</i> )                             | 4.57  |  |
|  |                                          |  |  |  |  | H1299 ( <i>non-small cell lung carcinoma</i> )               | 5.83  |  |
|  |                                          |  |  |  |  | HUCCT1 ( <i>bile duct carcinoma</i> )                        | 9.79  |  |
|  |                                          |  |  |  |  | B16F10 ( <i>highly metastatic mouse melanoma cell line</i> ) | 5.89  |  |
|  |                                          |  |  |  |  | Karpas299 ( <i>T cell lymphoma</i> )                         | 2.57  |  |
|  |                                          |  |  |  |  |                                                              | 5.48  |  |
|  |                                          |  |  |  |  |                                                              | 5.92  |  |

|  |  |  |  |  |  |                                                                     |  |      |  |
|--|--|--|--|--|--|---------------------------------------------------------------------|--|------|--|
|  |  |  |  |  |  | Hep3B (liver cancer)                                                |  | 6.32 |  |
|  |  |  |  |  |  | A431 (Epidermoid carcinoma cell line)                               |  | 5.79 |  |
|  |  |  |  |  |  | 143B (bone osteosarcoma)                                            |  | 2.99 |  |
|  |  |  |  |  |  | MKN-45 (gastric cancer)                                             |  |      |  |
|  |  |  |  |  |  | H1975 (non-small cell lung carcinoma with L858R and T790M mutation) |  | 6.89 |  |
|  |  |  |  |  |  | HL-60 (promyelocytic leukemia)                                      |  | 5.61 |  |
|  |  |  |  |  |  | DU145 (prostate cancer)                                             |  | 9.31 |  |
|  |  |  |  |  |  | SPC-A1 (lung cancer over expressing maspin cell line)               |  |      |  |

**Table S2. The IC<sub>50</sub> of marine-derived terpenes and terpenoids with anticancer activity**

| S/N | Isolated Compounds                                                                       | Class          | Status (Known /Novel) | Source                                                                                                          | Year | Cancer cell line  | Source    | IC <sub>50</sub> (μM) | Ref |
|-----|------------------------------------------------------------------------------------------|----------------|-----------------------|-----------------------------------------------------------------------------------------------------------------|------|-------------------|-----------|-----------------------|-----|
| 1.  | Eutypellacytosporin A, C <sub>40</sub> H <sub>58</sub> O <sub>11</sub> (Cpd. <b>91</b> ) | Meroterpenoids | All Novel             | Arctic fungus Eutypella sp. D-1 from soil of London Island of ongsfjorden of Ny-Ålesund District in the Arctic. | 2019 | DU145 (prostate)  | All human | 17.1                  | 48  |
|     | Eutypellacytosporin B, C <sub>40</sub> H <sub>58</sub> O <sub>11</sub> (Cpd. <b>92</b> ) |                |                       |                                                                                                                 |      | SW1990 (pancreas) |           | 7.3                   |     |
|     | Eutypellacytosporin C, C <sub>40</sub> H <sub>58</sub> O <sub>11</sub> (Cpd. <b>93</b> ) |                |                       |                                                                                                                 |      | Huh7 (liver)      |           | 8.4                   |     |
|     | Eutypellacytosporin D, C <sub>40</sub> H <sub>58</sub> O <sub>11</sub> (Cpd. <b>94</b> ) |                |                       |                                                                                                                 |      | Panc-1 (pancreas) |           | 9.7                   |     |
|     |                                                                                          |                |                       |                                                                                                                 |      | DU145 (prostate)  |           | 11.0                  |     |
|     |                                                                                          |                |                       |                                                                                                                 |      | SW1990 (pancreas) |           | 4.9                   |     |
|     |                                                                                          |                |                       |                                                                                                                 |      | Huh7 (liver)      |           | 4.9                   |     |
|     |                                                                                          |                |                       |                                                                                                                 |      | Panc-1 (pancreas) |           | 7.9                   |     |
|     |                                                                                          |                |                       |                                                                                                                 |      | DU145 (prostate)  |           | 13.5                  |     |
|     |                                                                                          |                |                       |                                                                                                                 |      | SW1990 (pancreas) |           | 9.6                   |     |
|     |                                                                                          |                |                       |                                                                                                                 |      | Huh7 (liver)      |           | 11.2                  |     |
|     |                                                                                          |                |                       |                                                                                                                 |      | Panc-1 (pancreas) |           | 10.2                  |     |
|     |                                                                                          |                |                       |                                                                                                                 |      | DU145 (prostate)  |           | 13.4                  |     |
|     |                                                                                          |                |                       |                                                                                                                 |      | SW1990 (pancreas) |           | 8.2                   |     |
|     |                                                                                          |                |                       |                                                                                                                 |      | Huh7 (liver)      |           | 9.6                   |     |
|     |                                                                                          |                |                       |                                                                                                                 |      | Panc-1 (pancreas) |           | 7.5                   |     |

|    |                                                                                                                                                                                                                   |                                                                                |                                            |                                                                                                                        |      |                                                                                                                                                                                                                                                                                                                                      |                         |                                                                                                                      |    |
|----|-------------------------------------------------------------------------------------------------------------------------------------------------------------------------------------------------------------------|--------------------------------------------------------------------------------|--------------------------------------------|------------------------------------------------------------------------------------------------------------------------|------|--------------------------------------------------------------------------------------------------------------------------------------------------------------------------------------------------------------------------------------------------------------------------------------------------------------------------------------|-------------------------|----------------------------------------------------------------------------------------------------------------------|----|
| 2. | Diorcinol (Cpd. <b>97</b> )<br>Versicolorin B (Cpd. <b>101</b> )                                                                                                                                                  | Indoloditerpenes                                                               | Both Known                                 | Marine-derived fungus <i>Aspergillus versicolor</i> ZZ761                                                              | 2019 | U87MG (glioma)<br>U251 (glioma)<br>U87MG (glioma)                                                                                                                                                                                                                                                                                    | Both human              | 4.4<br>6.2<br>11.3                                                                                                   | 49 |
| 3. | Insulicolide A (Cpd. <b>114</b> )                                                                                                                                                                                 | Drimane sesquiterpenoid derivatives                                            | Known                                      | <i>Aspergillus. Flocculosus</i> obtained from marine sediment sample (Nha Trang Bay, South ChinanSea, Vietnam          | 2019 | 22Rv1 (prostate)<br>Neuro-2a (neuron)                                                                                                                                                                                                                                                                                                | Human<br>Murine         | 3.0<br>4.9                                                                                                           | 50 |
| 4. | 19-methoxy-dictyoceratin-A (Cpd. <b>123</b> )<br>Smenospongiarine (Cpd. <b>125</b> )<br><br>Smenospongiorine (C. <b>126</b> )<br><br>Smenospongimine (Cpd. <b>127</b> )<br><br>Dictyoceratin-C (Cpd. <b>128</b> ) | ?                                                                              | Novel<br><br>Known (Cpds. <b>125-128</b> ) | Marine sponge <i>Dactylospongia. elegans</i> was collected off Yongxing Island in the South China Sea                  | 2019 | Huh7 (liver)<br>DU145 (prostate)<br>SW1990 (pancreas)<br>Huh7 (liver)<br>Panc-1 (pancreas)<br>DU145 (prostate)<br>SW1990 (pancreas)<br>Huh7 (liver)<br>Panc-1 (pancreas)<br>DU145 (prostate)<br>SW1990 (pancreas)<br>Huh7 (liver)<br>Panc-1 (pancreas)<br>DU145 (prostate)<br>SW1990 (pancreas)<br>Huh7 (liver)<br>Panc-1 (pancreas) | All human               | 17.4<br>6.1<br>5.9<br>3.7<br>8.7<br>4.2<br>4.4<br>3.0<br>7.7<br>3.5<br>4.2<br>2.3<br>5.8<br>8.3<br>7.9<br>6.9<br>9.2 | 51 |
| 5. | Andrastone A (Cpd. <b>129</b> )                                                                                                                                                                                   | Meroterpenoids                                                                 | Novel                                      | Deep-Sea-Derived Fungus <i>Penicillium allii-sativi</i> from the deep-sea water of the western Pacific                 | 2019 | HepG2 (liver)                                                                                                                                                                                                                                                                                                                        | Human                   | 7.8                                                                                                                  | 52 |
| 6. | Sakurasosaponin (Cpd. <b>133</b> )<br><br>Sakurasosaponin methyl ester (Cpd. <b>134</b> )                                                                                                                         | Triterpene saponin                                                             | Both known                                 | Leaves of the mangrove <i>Aegiceras corniculatum</i> were collected from Bai Tu Long bay, Quang Ninh Province, Vietnam | 2019 | MCF-7 (breast)<br>A549 (lung adenocarcinoma)<br>B16F10 (melanoma)<br>HCT116 (colon)<br>MCF-7 (breast)<br>A549 (lung adenocarcinoma)<br>B16F10 (melanoma)<br>HCT116 (colon)                                                                                                                                                           | All human               | 9.85<br>2.89<br>4.96<br>3.40<br>9.86<br>5.45<br>18.27<br>2.21                                                        | 53 |
| 7. | Flaccidenol A (Cpd. <b>149</b> )                                                                                                                                                                                  | Capnosane (Cpd. <b>149</b> ) cembranoids (Cpd <b>151</b> ) -based diterpenoids | Novel ( <b>149, 151</b> )                  | From marine soft coral <i>Klyxum flaccidum</i> , collected off the coast of the island of Pratas                       | 2019 | A549 (lung adenocarcinoma)<br>DLD-1 (colorectal adenocarcinoma)                                                                                                                                                                                                                                                                      | Human<br>Human<br>Mouse | 9.7<br>6.0<br>7.2                                                                                                    | 54 |

|     |                                                                                                                                                                     |                  |                                                           |                                                                                          |      |                                                                                                                                                                                                                                                                                                                                                                                                                              |                           |                                                         |    |
|-----|---------------------------------------------------------------------------------------------------------------------------------------------------------------------|------------------|-----------------------------------------------------------|------------------------------------------------------------------------------------------|------|------------------------------------------------------------------------------------------------------------------------------------------------------------------------------------------------------------------------------------------------------------------------------------------------------------------------------------------------------------------------------------------------------------------------------|---------------------------|---------------------------------------------------------|----|
|     | Flaccidodioxide (Cpd. <b>151</b> )<br>14-Oacetylsarcophytol B (Cpd. <b>155</b> )                                                                                    |                  | Known                                                     |                                                                                          |      | P388D1 ( <i>mouse lymphocytic leukaemia</i> )<br>P388D1( <i>mouse lymphocytic leukaemia</i> )<br>A549( <i>lung adenocarcinoma</i> )<br>DLD-1 ( <i>colorectal adenocarcinoma</i> )<br>P388D1 ( <i>mouse lymphocytic leukemia</i> )                                                                                                                                                                                            |                           | 19.6<br>10.8<br>11.7<br>8.9                             |    |
| 8.  | Asterolaurin N (Cpd. <b>156</b> )<br>13-epi-9-desacetyl Xenicin (Cpd. <b>157</b> )<br>Xeniolide-B 9-acetate (Cpd. <b>158</b> )<br>Asterolaurin I (Cpd. <b>159</b> ) | Diterpenes       | Novel (Cpd. <b>156</b> )<br>Known (Cpds. <b>157-159</b> ) | Taiwanese soft coral <i>Asterospicularia laurae</i> , southern coast of Taiwan           | 2019 | Molt 4 ( <i>T lymphoblast; acute lymphoblastic leukaemia</i> )<br>Molt 4 ( <i>T lymphoblast; acute lymphoblastic leukaemia</i> )<br>K562 ( <i>blood chronic myelogenous leukaemia</i> )<br>Sup-T1 ( <i>T cell lymphoblastic lymphoma</i> )<br>U937 ( <i>Caucasian histiocytic lymphoma</i> )<br>Molt 4 T lymphoblast; <i>acute lymphoblastic leukaemia</i> )<br>Molt 4 T lymphoblast; <i>acute lymphoblastic leukaemia</i> ) | All human                 | 19.41<br>1.30<br>1.19<br>3.17<br>2.45<br>15.13<br>18.75 | 55 |
| 9.  | Cembranolide diterpene derivative 1 (Cpd. <b>160</b> )                                                                                                              | Diterpenoid      | Novel                                                     | Soft coral, <i>Lobophytum</i> sp. from the coast of Irabu Island, Okinawa, Japan         | 2019 | HeLa ( <i>cervix</i> )<br>A549 ( <i>lung</i> )<br>B16-F10 ( <i>melanoma</i> )<br>RAW 264.7 ( <i>murine macrophage</i> )                                                                                                                                                                                                                                                                                                      | Human (First 3)<br>Murine | 7.81<br>9.30<br>10.83<br>5.99                           | 56 |
| 10. | Ambliol C (Cpd. <b>174</b> )                                                                                                                                        | Furanoditerpenes | Known                                                     | Sponge <i>Spongia tubulifera</i> collected from the coast of the Mexican Caribbean       | 2019 | MCF-7 ( <i>breast</i> )<br>MiaPaca-2 ( <i>pancreas</i> )                                                                                                                                                                                                                                                                                                                                                                     | Both human                | 19.9<br>11.7                                            | 57 |
| 11. | Aphidicolin A (Gpd. <b>183</b> )                                                                                                                                    | Diterpenoids     | Novel                                                     | Deep-Sea-Derived Fungus <i>Botryotinia fuckeliana</i> MCCC 3A00494 western Pacific Ocean | 2019 | T24 ( <i>Kidney</i> )<br>HL-60 ( <i>Leukaemia</i> )                                                                                                                                                                                                                                                                                                                                                                          | Both human                | 2.5<br>6.1                                              | 58 |

|     |                                                 |                                                                                |                                                                    |                                                                                           |      |                               |            |       |    |
|-----|-------------------------------------------------|--------------------------------------------------------------------------------|--------------------------------------------------------------------|-------------------------------------------------------------------------------------------|------|-------------------------------|------------|-------|----|
| 12. | Ilimaquinone (Cpd. <b>255</b> )                 | Sesquiterpene quinones and quinols                                             | All known                                                          | Marine Sponge <i>Dactylospongia elegans</i> Sheraton Caverns, Kauai, Hawaiian             | 2019 | U251MG (glioblastoma)         | Both human | 19.3  | 59 |
|     | 5- <i>epi</i> -ilimaquinone (Cpd. <b>256</b> )  |                                                                                |                                                                    |                                                                                           |      | U251MG (glioblastoma)         |            | 19.4  |    |
|     |                                                 |                                                                                |                                                                    |                                                                                           |      | Panc-1 (pancreatic carcinoma) |            | 16.2  |    |
|     | Smenospongine (Cpd. <b>257</b> )                |                                                                                |                                                                    |                                                                                           |      | U251MG(glioblastoma)          |            | 2.4   |    |
|     | Smenospongine (Cpd. <b>258</b> )                |                                                                                |                                                                    |                                                                                           |      | U251MG (glioblastoma)         |            | 19.4  |    |
|     | Smenospongiarine (Cpd. <b>259</b> )             |                                                                                |                                                                    |                                                                                           |      | U251MG (glioblastoma)         |            | 4.5   |    |
|     | Smenospongidine (Cpd. <b>260</b> )              |                                                                                |                                                                    |                                                                                           |      | Panc-1 (pancreatic carcinoma) |            | 15.1  |    |
|     |                                                 |                                                                                |                                                                    |                                                                                           |      | U251MG (glioblastoma)         |            | 4.0   |    |
|     | Dictyoceratin A (Cpd. <b>261</b> )              |                                                                                |                                                                    |                                                                                           |      | Panc-1 (pancreatic carcinoma) |            | 12.6  |    |
|     | Dictyoceratin B (Cpd. <b>262</b> )              |                                                                                |                                                                    |                                                                                           |      | U251MG (glioblastoma)         |            | 2.8   |    |
| 13. | Dictyoceratin C (Cpd. <b>263</b> )              | Chlorinated briarane diterpenoids                                              | All known                                                          | <i>Erythropodium caribaeorum</i> from soft coral collected from Caribbean sea in Colombia | 2019 | U251MG (glioblastoma)         | All human  | 8.4   | 60 |
|     |                                                 |                                                                                |                                                                    |                                                                                           |      | U251MG (glioblastoma)         |            | 4.1   |    |
|     | Erythrolide D (Cpd. <b>268</b> )                |                                                                                |                                                                    |                                                                                           |      | A549 (lung)                   |            | 2.58  |    |
|     | Erythrolide A (Cpd. <b>275</b> )                |                                                                                |                                                                    |                                                                                           |      | A549 (lung)                   |            | 18.41 |    |
| 14. |                                                 | Nortriterpenoids (Cpd. <b>281</b> )<br>Lignan (Cpds. <b>287</b> , <b>289</b> ) | Novel (Cpd. <b>281</b> )<br>Known (Cpds. <b>287</b> , <b>289</b> ) | <i>Schisandra sphenanthera</i> collected in KonTum province, Vietnam                      | 2019 | MCF-7 (breast)                | Both human | 6.77  | 61 |
|     |                                                 |                                                                                |                                                                    |                                                                                           |      | PC3 (prostate)                |            | 2.45  |    |
|     |                                                 |                                                                                |                                                                    |                                                                                           |      | MCF-7 (breast)                |            | 15.21 |    |
|     |                                                 |                                                                                |                                                                    |                                                                                           |      | PC3 (prostate)                |            | 6.46  |    |
| 15. | Henridilactone A (Cpd. <b>281</b> )             | Sesquiterpenoid quinones                                                       | Novel (Gpd. <b>290</b> )<br>Known (Cpds. <b>292</b> - <b>296</b> ) | Marine sponge <i>Dysidea</i> sp from Xisha Islands, South China                           | 2019 | PC3 (prostate)                | All human  | 3.21  | 62 |
|     | Schisandrathera C (Cpd. <b>287</b> )            |                                                                                |                                                                    |                                                                                           |      | MCF-7 (breast)                |            | 13.30 |    |
|     | Schirubrisin B (Cpd. <b>289</b> )               |                                                                                |                                                                    |                                                                                           |      | PC3 (prostate)                |            | 19.11 |    |
|     |                                                 |                                                                                |                                                                    |                                                                                           |      | MCF-7 (breast)                |            | 13.30 |    |
|     | (+)-19-methylaminoavarone (Cpd. <b>290</b> )    | Sesquiterpenoid quinones                                                       | Novel (Gpd. <b>290</b> )<br>Known (Cpds. <b>292</b> - <b>296</b> ) | Marine sponge <i>Dysidea</i> sp from Xisha Islands, South China                           | 2019 | PC3 (prostate)                | All human  | 3.21  |    |
|     | (-)-20-methoxyneoavarone (Cpd. <b>291</b> )     |                                                                                |                                                                    |                                                                                           |      | MCF-7 (breast)                |            | 17.82 |    |
|     |                                                 |                                                                                |                                                                    |                                                                                           |      | HCT-116 (colon)               |            | 5.48  |    |
|     |                                                 |                                                                                |                                                                    |                                                                                           |      | A549 (lung)                   |            | 4.61  |    |
|     |                                                 |                                                                                |                                                                    |                                                                                           |      | HeLa (cervix)                 |            | 0.93  |    |
|     |                                                 |                                                                                |                                                                    |                                                                                           |      | HCT-116                       |            | 1.31  |    |
|     |                                                 |                                                                                |                                                                    |                                                                                           |      | Jurkat cell (T-lymphocyte)    |            | 2.29  |    |
|     |                                                 |                                                                                |                                                                    |                                                                                           |      | K562 (leukaemia)              |            |       |    |
|     |                                                 |                                                                                |                                                                    |                                                                                           |      | BEL-7402 (hepatoma)           |            | 3.07  |    |
|     |                                                 |                                                                                |                                                                    |                                                                                           |      | HCT-116 (colon)               |            | 4.02  |    |
|     |                                                 |                                                                                |                                                                    |                                                                                           |      | Jurkat cell (T-lymphocyte)    |            | 5.19  |    |
|     |                                                 |                                                                                |                                                                    |                                                                                           |      | K562 (leukaemia)              |            | 2.69  |    |
|     | (p)-20-methoxyavarone (Cpd. <b>292</b> )        |                                                                                |                                                                    |                                                                                           |      |                               |            | 13.35 |    |
|     |                                                 |                                                                                |                                                                    |                                                                                           |      | A549 (lung)                   |            | 7.66  |    |
|     |                                                 |                                                                                |                                                                    |                                                                                           |      | HeLa (cervix)                 |            | 4.88  |    |
|     | (-)-20-phenethylaminoavarone (Cpd. <b>294</b> ) |                                                                                |                                                                    |                                                                                           |      | HCT-116                       |            | 3.52  |    |
|     |                                                 |                                                                                |                                                                    |                                                                                           |      | Jurkat cell (T-lymphocyte)    |            | 12.58 |    |
|     |                                                 |                                                                                |                                                                    |                                                                                           |      |                               |            |       |    |
|     |                                                 |                                                                                |                                                                    |                                                                                           |      |                               |            |       |    |
|     |                                                 |                                                                                |                                                                    |                                                                                           |      |                               |            |       |    |

12

|     |                                                                                                                                                                                                                                                                                                                                                                                                                                           |                                                                      |                                                                |                                                                                                    |      |                                                                                                                                                                                                                                                                                                                                                                                                                                                                                                                                                                           |           |                                                                                                                                                      |    |
|-----|-------------------------------------------------------------------------------------------------------------------------------------------------------------------------------------------------------------------------------------------------------------------------------------------------------------------------------------------------------------------------------------------------------------------------------------------|----------------------------------------------------------------------|----------------------------------------------------------------|----------------------------------------------------------------------------------------------------|------|---------------------------------------------------------------------------------------------------------------------------------------------------------------------------------------------------------------------------------------------------------------------------------------------------------------------------------------------------------------------------------------------------------------------------------------------------------------------------------------------------------------------------------------------------------------------------|-----------|------------------------------------------------------------------------------------------------------------------------------------------------------|----|
|     | Ophiobolin C (Cpd. <b>311</b> )<br><br>6- <i>epi</i> -ophiobolin N (Cpd. <b>312</b> )<br><br>Ophiobolin N (Cpd. <b>313</b> )                                                                                                                                                                                                                                                                                                              |                                                                      |                                                                |                                                                                                    |      | PC-3( <i>prostate</i> )<br>MDA-MB-231 ( <i>breast</i> )<br>HCT-15( <i>colon</i> )<br>NUGC-3 ( <i>stomach</i> )<br>NCI-H23 ( <i>lung</i> )<br>ACHN ( <i>renal</i> )<br>PC-3( <i>prostate</i> )<br>MDA-MB-231 ( <i>breast</i> )<br>HCT-15( <i>colon</i> )<br>NUGC-3 ( <i>stomach</i> )<br>NCI-H23 ( <i>lung</i> )<br>ACHN ( <i>renal</i> )<br>PC-3( <i>prostate</i> )<br>MDA-MB-231 ( <i>breast</i> )<br>HCT-15( <i>colon</i> )<br>NUGC-3 ( <i>stomach</i> )<br>NCI-H23 ( <i>lung</i> )<br>ACHN ( <i>renal</i> )<br>PC-3( <i>prostate</i> )<br>MDA-MB-231 ( <i>breast</i> ) |           | 0.19<br>0.21<br>0.20<br>0.16<br>0.20<br>0.36<br>0.22<br>0.30<br>0.22<br>0.22<br>0.23<br>0.20<br>0.21<br>0.22<br>0.20<br>0.22<br>0.42<br>0.20<br>0.19 |    |
| 18. | 12-O-acetyl-nardosinan-6-en-1-one (Cpd. <b>314</b> )<br>6b-acetyl-1(10)-a-13-nornardosin-7-one (Cpd. <b>315</b> )<br>6,7-seco-13-nornardosinane (Cpd. <b>316</b> )<br>6a-acetyl-1(10)-a-13-nornardosin-7-one (Cpd. <b>317</b> )<br>12-Acetoxy-l(10)-aristolene (Cpd. <b>318</b> )<br>4-Acetoxy-2,8-neolemnadien-5-one (Cpd. <b>319</b> )<br>Cembranoid-diterpene Nephthenol (Cpd. <b>320</b> )<br>24-Methylcholesterol (Cpd. <b>321</b> ) | Sesquiterpenes (Cpds. <b>314-320</b> )<br>Steroid (Cpd. <b>321</b> ) | Novel (Cpds. <b>314-316</b> )<br>Known (Cpds. <b>317-321</b> ) | Soft coral <i>Rhytisma. fulvum fulvum</i> collected from the Red Sea Coast at Jeddah, Saudi Arabia | 2019 | NCI-H1299 ( <i>lung</i> )<br>HepG-2 ( <i>liver</i> )<br>NCI-H1299 ( <i>lung</i> )<br>MCF-7 ( <i>breast</i> )<br>MCF-7 ( <i>breast</i> )                                                                                                                                           | All human | 0.036<br>0.083<br>0.097<br>0.370<br>0.088<br>0.246<br>0.097<br>0.370<br>0.036<br>0.072<br>0.036<br>0.083<br>0.035<br>0.034<br>0.133                  | 65 |

**Table S3. The IC<sub>50</sub> of marine-derived amino acids, peptides, and polyketides with anticancer activity**

| S/N | Isolated Compounds                                                 | Class                                                                                         | Status (Known/Novel)                                                     | Source                                                                                               | Year | Cancer Cell line                                                                                                     | Source    | IC <sub>50</sub> (μM) | Ref. |
|-----|--------------------------------------------------------------------|-----------------------------------------------------------------------------------------------|--------------------------------------------------------------------------|------------------------------------------------------------------------------------------------------|------|----------------------------------------------------------------------------------------------------------------------|-----------|-----------------------|------|
| 1.  | C <sub>31</sub> H <sub>37</sub> NO <sub>7</sub> (Cpd. <b>323</b> ) | Ansamycins (Divergolide) – Macrolides (polyketides)                                           | All Novel                                                                | <i>Streptomyces</i> sp. KFD18 from Danzhou, Hainan province, China                                   | 2019 | SGC-7901 ( <i>gastric</i> )<br>K562 ( <i>leukaemia</i> )<br>Hela ( <i>cervix</i> )<br>A549 ( <i>lung carcinoma</i> ) | All Human | 2.8                   | 66   |
|     | C <sub>31</sub> H <sub>37</sub> NO <sub>8</sub> (Cpd. <b>324</b> ) |                                                                                               |                                                                          |                                                                                                      |      |                                                                                                                      |           | 6.6                   |      |
|     | C <sub>31</sub> H <sub>37</sub> NO <sub>7</sub> (Cpd. <b>325</b> ) |                                                                                               |                                                                          |                                                                                                      |      |                                                                                                                      |           | 9.6                   |      |
|     | C <sub>31</sub> H <sub>37</sub> NO <sub>7</sub> (Cpd. <b>326</b> ) |                                                                                               |                                                                          |                                                                                                      |      |                                                                                                                      |           | 14.9                  |      |
| 2.  | Microcolin E (Cpd. <b>329</b> )                                    | Lipopeptides (Cpds. <b>329-335</b> and <b>337</b> )<br>Microcolins deriv. ( <b>342, 343</b> ) | Novel (Cpds. <b>329-335</b> and <b>337</b> )<br>Known ( <b>338-341</b> ) | The cyanobacteria ( <i>Moorea producens</i> ) samples were collected off Playa Kalki, Curacao        | 2019 | H-460 ( <i>lung</i> )                                                                                                | Human     | 1.0                   | 67   |
|     | Microcolin F (Cpd. <b>330</b> )                                    |                                                                                               |                                                                          |                                                                                                      |      |                                                                                                                      |           | 0.037                 |      |
|     | Microcolin G (Cpd. <b>331</b> )                                    |                                                                                               |                                                                          |                                                                                                      |      |                                                                                                                      |           | 0.16                  |      |
|     | Microcolin H (Cpd. <b>332</b> )                                    |                                                                                               |                                                                          |                                                                                                      |      |                                                                                                                      |           | 0.047                 |      |
|     | Microcolin I (Cpd. <b>333</b> )                                    |                                                                                               |                                                                          |                                                                                                      |      |                                                                                                                      |           | 0.55                  |      |
|     | Microcolin J (Cpd. <b>334</b> )                                    |                                                                                               |                                                                          |                                                                                                      |      |                                                                                                                      |           | 0.069                 |      |
|     | Microcolin K (Cpd. <b>335</b> )                                    |                                                                                               |                                                                          |                                                                                                      |      |                                                                                                                      |           | 0.20                  |      |
|     | Microcolin M (Cpd. <b>337</b> )                                    |                                                                                               |                                                                          |                                                                                                      |      |                                                                                                                      |           | 0.51                  |      |
|     | Microcolin A (Cpd. <b>338</b> )                                    |                                                                                               |                                                                          |                                                                                                      |      |                                                                                                                      |           | 0.91                  |      |
|     | Microcolin B (Cpd. <b>339</b> )                                    |                                                                                               |                                                                          |                                                                                                      |      |                                                                                                                      |           | 0.65                  |      |
|     | Microcolin C (Cpd. <b>340</b> )                                    |                                                                                               |                                                                          |                                                                                                      |      |                                                                                                                      |           | 0.075                 |      |
|     | Microcolin D (Cpd. <b>341</b> )                                    |                                                                                               |                                                                          |                                                                                                      |      |                                                                                                                      |           | 2.80                  |      |
|     | 3,4-dihydromicrocolins C (Cpd. <b>342</b> )                        |                                                                                               |                                                                          |                                                                                                      |      |                                                                                                                      |           | 5.0                   |      |
|     | 3,4-dihydromicrocolins D (Cpd. <b>343</b> )                        |                                                                                               |                                                                          |                                                                                                      |      |                                                                                                                      |           | 2.0                   |      |
| 3.  | Akazamicin (Cpd. <b>346</b> )                                      | Aromatic polyketide                                                                           | Novel                                                                    | Nonomuraea sp. AKA32, marine-derived actinomycetes isolated from deep-sea water in Sagami Bay, Japan | 2019 | B16 ( <i>melanoma</i> )                                                                                              | Murine    | 1.7                   | 69   |
|     | Actinofuranone C (Cpd. <b>347</b> )                                |                                                                                               | Known                                                                    |                                                                                                      |      |                                                                                                                      |           | 1.2                   |      |
| 4.  | Cytosaminomycin E (Cpd. <b>359</b> )                               | Pyrimidine nucleoside (Cpd. <b>361</b> ) and derivatives (Cpds. <b>360-364</b> )              | Novel Known ( <b>360-364</b> )                                           | Marine-derived Streptomyces sp. SSA28 from Shengsi Archipelago (Zhejiang Province, China)            | 2019 | HCT-116 ( <i>colon</i> )                                                                                             | Human     | 0.39                  | 70   |
|     | 40551-L (Cpd. <b>360</b> )                                         |                                                                                               |                                                                          |                                                                                                      |      |                                                                                                                      |           | 0.78                  |      |
|     | 40551-K (Cpd. <b>361</b> )                                         |                                                                                               |                                                                          |                                                                                                      |      |                                                                                                                      |           | 6.45                  |      |
|     | 40551-F (Cpd. <b>362</b> )                                         |                                                                                               |                                                                          |                                                                                                      |      |                                                                                                                      |           | 6.63                  |      |
|     | 40551-D (Cpd. <b>363</b> )                                         |                                                                                               |                                                                          |                                                                                                      |      |                                                                                                                      |           | 2.14                  |      |
|     | 40551-G (Cpd. <b>364</b> )                                         |                                                                                               |                                                                          |                                                                                                      |      |                                                                                                                      |           | 0.89                  |      |
| 5.  | Fuscasins A (Cpd. <b>372</b> )                                     | Cycloheptapeptides                                                                            | Novel                                                                    | Marine Sponge Phakellia fusca from from the South China Sea                                          | 2019 | HepG2 ( <i>liver</i> )                                                                                               | Human     | 4.6                   | 71   |

|    |                                      |                                               |               |                                                                                                                                                           |      |                                                                                                                                                                                                                                                                                                                                                                                                                                                                                                                                                                                                                                                                                                                                                                                                                                                                                                                                                              |              |                                                                                                                                                                                                                                                                               |    |
|----|--------------------------------------|-----------------------------------------------|---------------|-----------------------------------------------------------------------------------------------------------------------------------------------------------|------|--------------------------------------------------------------------------------------------------------------------------------------------------------------------------------------------------------------------------------------------------------------------------------------------------------------------------------------------------------------------------------------------------------------------------------------------------------------------------------------------------------------------------------------------------------------------------------------------------------------------------------------------------------------------------------------------------------------------------------------------------------------------------------------------------------------------------------------------------------------------------------------------------------------------------------------------------------------|--------------|-------------------------------------------------------------------------------------------------------------------------------------------------------------------------------------------------------------------------------------------------------------------------------|----|
| 6. | Julichrome Q6.6 (Cpd. <b>378</b> )   | Julichrome derivative<br>Aromatic hydrocarbon | Both<br>known | <i>Streptomyces</i> sp., NH1835 isolated from soil samples at the suburb of Wanning, Hainan province, China,                                              | 2019 | HepG-2 ( <i>hepatic</i> )<br>SMMC-7721 ( <i>liver</i> )<br>MCF-7 ( <i>breast</i> )<br>MDA-MB-231 ( <i>breast</i> )                                                                                                                                                                                                                                                                                                                                                                                                                                                                                                                                                                                                                                                                                                                                                                                                                                           | All<br>Human | 1.45<br>0.11<br>0.37<br>0.26                                                                                                                                                                                                                                                  | 72 |
|    | Gliotoxin (Cpd. <b>382</b> )         | Diketopiperazine<br>Amino acid                |               |                                                                                                                                                           |      | HepG-2 ( <i>hepatic</i> )<br>SMMC-7721 ( <i>liver</i> )<br>MCF-7 ( <i>breast</i> )<br>MDA-MB-231 ( <i>breast</i> )                                                                                                                                                                                                                                                                                                                                                                                                                                                                                                                                                                                                                                                                                                                                                                                                                                           |              | 13.18<br>1.89<br>0.99<br>0.92                                                                                                                                                                                                                                                 |    |
| 7. | Boshramycinones A (Cpd. <b>383</b> ) | Anthracyclinones.<br>Polyketides              | Novel         | Marine-derived <i>Streptomyces</i> sp. Mei 16-1,2 from soil sample of Caeciliengroden salty marshland Wadden Sea at Jade Bay, North Sea coast of Germany) | 2019 | 1218L ( <i>bladder</i> )<br>T24 ( <i>bladder</i> )<br>498N ( <i>CNS</i> )<br>SF 268 ( <i>CNS</i> )<br>HCT-116 ( <i>Colorectal</i> )<br>HT 29 ( <i>Colorectal</i> )<br>251L ( <i>Gastric</i> )<br>1121L ( <i>Lung</i> )<br>289L ( <i>Lung</i> )<br>526L ( <i>Lung</i> )<br>529L ( <i>Lung</i> )<br>629L ( <i>Lung</i> )<br>H460 ( <i>Lung</i> )<br>401NL ( <i>Breast</i> )<br>MCF-7 ( <i>Breast</i> )<br>276L ( <i>melanoma</i> )<br>394NL ( <i>melanoma</i> )<br>462NL ( <i>melanoma</i> )<br>514L ( <i>Melanoma</i> )<br>520L ( <i>Melanoma</i> )<br>1619L ( <i>Ovary</i> )<br>899L ( <i>Ovary</i> )<br>OVCAR ( <i>Ovary</i> )<br>Panc-1 ( <i>Pancreas</i> )<br>22RV1 ( <i>Prostate</i> )<br>DU145 ( <i>Prostate</i> )<br>LNCap ( <i>Prostate</i> )<br>PC3M ( <i>Prostate</i> )<br>1752L ( <i>Pleuromesothelioma</i> )<br>393NL ( <i>Kidney</i> )<br>486L ( <i>Kidney</i> )<br>944L ( <i>Kidney</i> )<br>1718L ( <i>Kidney</i> )<br>1138L ( <i>Uterus</i> ) | All<br>Human | 1.11<br>1.14<br>0.86<br>0.95<br>1.47<br>0.95<br>1.31<br>1.09<br>2.76<br>2.56<br>1.18<br>1.64<br>1.35<br>1.34<br>1.26<br>1.46<br>0.90<br>1.29<br>0.97<br>3.29<br>1.20<br>4.87<br>0.66<br>1.06<br>0.51<br>1.66<br>1.04<br>0.99<br>6.75<br>1.06<br>12.18<br>1.63<br>2.62<br>0.93 | 74 |

|     |                                                                                                                                                                                                                                                                                                                                                                                                                           |                       |                                                           |                                                                                                                                                                  |      |                                                                                                                                                                                                                                                                                                                                                                          |           |                                                                                                      |    |
|-----|---------------------------------------------------------------------------------------------------------------------------------------------------------------------------------------------------------------------------------------------------------------------------------------------------------------------------------------------------------------------------------------------------------------------------|-----------------------|-----------------------------------------------------------|------------------------------------------------------------------------------------------------------------------------------------------------------------------|------|--------------------------------------------------------------------------------------------------------------------------------------------------------------------------------------------------------------------------------------------------------------------------------------------------------------------------------------------------------------------------|-----------|------------------------------------------------------------------------------------------------------|----|
|     | Boshramycinones B (Cpd. <b>384</b> )                                                                                                                                                                                                                                                                                                                                                                                      |                       |                                                           |                                                                                                                                                                  |      | MCF-7 ( <i>breast</i> )<br>394NL ( <i>Melanoma</i> )<br>22RV1 ( <i>Prostate</i> )                                                                                                                                                                                                                                                                                        |           | 14.30<br>17.27<br>12.91                                                                              |    |
| 8.  | 16a-methylpregna-17a,19-dihydroxy-(9,11)-epoxy-4-ene-3,18-dione-20-acetoxy (Cpd. <b>392</b> )<br>Penicitrinone A (Cpd. <b>396</b> )                                                                                                                                                                                                                                                                                       | Steroid<br>Polyketide | Known<br>Novel                                            | Fungus <i>Penicillium citrinum</i> SCSIO 41017 associated with the sponge <i>Callyspongia</i> sp. from the sea area near Xuwen County, Guangdong Province, China | 2019 | MCF-7 ( <i>breast</i> )<br>SF-268 ( <i>brain</i> )<br>MCF-7 ( <i>breast</i> )<br>HepG-2 ( <i>liver</i> )<br>A549 ( <i>lung</i> )                                                                                                                                                                                                                                         | All human | 1.3<br>13.7<br>17.2<br>13.5<br>18.0                                                                  | 75 |
| 9.  | Peniciversiol A (Cpd. <b>404</b> )<br>Penicilactone A (Cpd. <b>407</b> )<br>Penicilactone B (Cpd. <b>408</b> )<br>3,3'-dihydroxy-5,5'-dimethyldiphenyl ether (Cpd. <b>411</b> )<br>Violaceol-II (Cpd. <b>415</b> )<br>3,8-dihydroxy-4-(2,3-dihydroxy-1-hydroxymethylpropyl)-1-methoxyxanthone (Cpd. <b>416</b> )<br>Asperdemin (Cpd. <b>417</b> )<br>Cyclophenol (Cpd. <b>418</b> )<br>Radiclonic acid (Cpd. <b>419</b> ) | Polyketides           | Novel ( <b>404, 407</b> )<br>Known ( <b>408-419</b> )     | Deep-Sea Derived Fungus <i>Penicillium chrysogenum</i> MCCC 3A00292                                                                                              | 2019 | BIU-87 ( <i>liver</i> )<br>ECA109 ( <i>oesophagus</i> )<br>ECA109 ( <i>oesophagus</i> )<br>BIU-87 ( <i>liver</i> )<br>ECA109 ( <i>oesophagus</i> )<br>BEL-7402 ( <i>hepatoma</i> )<br>BEL-7402 ( <i>hepatoma</i> )<br>BIU-87 ( <i>liver</i> )<br>BEL-7402 ( <i>hepatoma</i> )<br>BIU-87 ( <i>liver</i> )<br>ECA109 ( <i>oesophagus</i> )<br>BEL-7402 ( <i>hepatoma</i> ) | All human | 10.21<br>12.41<br>15.60<br>16.41<br>8.95<br>15.94<br>12.75<br>8.34<br>7.81<br>12.47<br>7.70<br>13.75 | 76 |
| 10. | Sekgranaticin (Cpd. <b>420</b> )<br>Granaticins A (Cpd. <b>421</b> )<br>Granaticins B (Cpd. <b>422</b> )<br>Methyl granaticinate (Cpd. <b>423</b> )                                                                                                                                                                                                                                                                       | Polyketide            | Novel (Cpd. <b>420</b> )<br>Known (Cpds. <b>421-423</b> ) | <i>Streptomyces</i> sp. 166# isolated from clayey cold saline soil collected at County Naqu District, Tibet, China.                                              | 2019 | MCF-7 ( <i>breast</i> )<br>A549 ( <i>lung</i> )<br>P6C ( <i>colorectal</i> )<br>HCT-116 ( <i>colon</i> )<br>MCF-7 ( <i>breast</i> )<br>A549 ( <i>lung</i> )<br>P6C ( <i>colorectal</i> )<br>HCT-116 ( <i>colon</i> )<br>MCF-7 ( <i>breast</i> )<br>A549 ( <i>lung</i> )<br>P6C ( <i>colorectal</i> )<br>HCT-116 ( <i>colon</i> )<br>MCF-7 ( <i>breast</i> )              | All human | 1.26<br>4.84<br>4.45<br>6.77<br>0.28<br>1.55<br>2.12<br>1.55<br>0.37<br>3.57<br>0.28<br>0.01<br>0.23 | 77 |

|     |                                                                                                                                                                                                                             |                                                                      |                                                 |                                                                                                                               |      |                                                                                                                                                                                                                                                                                                        |            |                                                                                                                   |    |
|-----|-----------------------------------------------------------------------------------------------------------------------------------------------------------------------------------------------------------------------------|----------------------------------------------------------------------|-------------------------------------------------|-------------------------------------------------------------------------------------------------------------------------------|------|--------------------------------------------------------------------------------------------------------------------------------------------------------------------------------------------------------------------------------------------------------------------------------------------------------|------------|-------------------------------------------------------------------------------------------------------------------|----|
|     |                                                                                                                                                                                                                             |                                                                      |                                                 |                                                                                                                               |      | A549 (lung)<br>P6C (colorectal)<br>HCT-116 (colon)                                                                                                                                                                                                                                                     |            | 1.39<br>0.88<br>0.02                                                                                              |    |
| 11. | Fusaperazine F (Cpd. 425)                                                                                                                                                                                                   | Diketopiperazine Cyclic dipeptides formed from N-terminal amino acid | Novel                                           | Marine derived fungus <i>Penicillium crustosum</i> HDN153086 from Antarctic sediment from Prydz Bay                           | 2019 | K562 (leukaemia)                                                                                                                                                                                                                                                                                       | Human      | 12.7                                                                                                              | 78 |
| 12. | K41 A (Cpd. 430)                                                                                                                                                                                                            | Polyether polyketide                                                 | known                                           | <i>Sireptomyces species</i> Actinobacteria isolated from sediment sample obtained from Mersin Coastline (Turkey)              | 2019 | CaCo-2 (colorectal)<br>PC-3 (prostate)                                                                                                                                                                                                                                                                 | Both human | 7.4<br>11.8                                                                                                       | 79 |
| 13. | Auxarthrol D (Cpd. 432)<br><br>Auxarthrol F (Cpd. 434)                                                                                                                                                                      | Anthraquinone derivatives (Polyketides)                              | Both novel                                      | Fungal strain HDN16-802 isolated from the sediment sample of Zhangzi Island, from Dalian, Liaoning Province, China            | 2019 | HL-60 (leukaemia)<br>HCT-116 (colorectal)<br>MDA-MB-231(Breast)<br>BEL-7402 (hepatoma)<br><br>HL-60 (leukaemia)<br>Hela (cervix)<br>HCT-116 (colorectal)<br>MGC-803 (gastric)<br>HO8910 (ovary)<br>MDA-MB-231(breast)<br>SH-SY5Y (Neuroblastoma)<br>PC-3 (prostate)<br>K562 (chronic myeloid leukemia) | All human  | 7.5<br>14.5<br>19.1<br><br>16.6<br><br>4.5<br>10.7<br>7.8<br>17.7<br>18.7<br>10.1<br><br>17.2<br><br>20.0<br>16.5 | 80 |
| 14. | Jasplakinolide (Cpd 437)<br>(+)-Jasplakinolide Z6 (Cpd. 440)<br>(+)-Jasplakinolide Z4 (Cpd. 442)<br>(+)-Jasplakinolide V (Cpd. 443)                                                                                         | Cyclodepsipeptide                                                    | Novel (Cpd. 440)<br>Known (Cpds. 441, 442, 443) | Marine sponge <i>Jaspis splendens</i> Samama, Panjang and Shoal islands of East Kalimantan (Indonesia)                        | 2019 | L5178Y (melanoma)                                                                                                                                                                                                                                                                                      | Mouse      | < 0.01<br>3.2<br>< 0.01<br>< 0.01                                                                                 | 82 |
| 15. | N-(3,7-dimethyl-2,6-octadienyl)-2-aza-2-deoxychaetoviridin A (Cpd. 445)<br>4'-epi-N-(3,7-dimethyl-2,6-octadienyl)-2-aza-2-deoxychaetoviridin A (Cpd. 446)<br>N-(3-methyl-2-butenyl)-2-aza-2-deoxychaetoviridin A (Cpd. 447) | Nitrogenated azaphilone polyketide                                   | All novel                                       | Deep-sea-derived fungus <i>Chaetomium globosum</i> MP4-S01-7 obtained from a water sample collected in the West Pacific Ocean | 2020 | MGC803 (gastric)<br>AGS (gastric)<br><br>MGC803<br>AGS<br><br>MGC803<br>AGS                                                                                                                                                                                                                            | Both human | 0.78<br>0.12<br><br>0.46<br>0.62<br><br>2.7<br>6.5                                                                | 83 |

|     |                                                                                                                                                                                                                                                                                                                                                                                                                                                   |                    |            |                                                                                                                                                |      |                                                                                                                                                                                                                                                                                                                                                                                                |            |                                                                      |               |
|-----|---------------------------------------------------------------------------------------------------------------------------------------------------------------------------------------------------------------------------------------------------------------------------------------------------------------------------------------------------------------------------------------------------------------------------------------------------|--------------------|------------|------------------------------------------------------------------------------------------------------------------------------------------------|------|------------------------------------------------------------------------------------------------------------------------------------------------------------------------------------------------------------------------------------------------------------------------------------------------------------------------------------------------------------------------------------------------|------------|----------------------------------------------------------------------|---------------|
|     | 4'-epi-N-(3-methyl-2-butenyl)-2-aza-2-deoxychaetoviridin A (Cpd. <b>448</b> )<br>N-(3,7-dimethyl-2,6-octadienyl)-2-aza-2-deoxychaetoviridin E (Cpd. <b>449</b> )<br>N-(3-methyl-2-butenyl)-2-aza-2-deoxychaetoviridin E (Cpd. <b>450</b> )<br>4',5'-dinor-5'-deoxy-N-(3,7-dimethyl-2,6-octadienyl)-2-aza-2-deoxychaetoviridin A (Cpd. <b>451</b> )<br>4',5'-dinor-5'-deoxy-N-(3-methyl-2-butenyl)-2-aza-2-deoxychaetoviridin A (Cpd. <b>452</b> ) |                    |            |                                                                                                                                                |      | MGC803<br>AGS<br>MGC803<br>AGS<br>MGC803<br>AGS<br>MGC803<br>AGS<br>MGC803                                                                                                                                                                                                                                                                                                                     |            | 3.0<br>2.9<br>0.72<br>0.12<br>6.8<br>2.0<br>2.2<br>1.2<br>5.8        |               |
| 16. | Epidithiodiketopiperazine · DC1149B (Cpd. <b>455</b> )                                                                                                                                                                                                                                                                                                                                                                                            | Piperazine         | Novel      | <i>Trichoderma lixii</i> isolated from an unidentified marine sponge collected at Mentawai, Indonesia                                          | 2020 | PANC-1 ( <i>pancreas</i> )                                                                                                                                                                                                                                                                                                                                                                     | Human      | 0.02                                                                 | <sup>84</sup> |
| 17. | Siphonellamides A (Cpd. <b>456</b> )<br>Siphonellamides B (Cpd. <b>457</b> )                                                                                                                                                                                                                                                                                                                                                                      | Acetylene amides   | Both novel | Marine sponge, <i>Siphonochalina. siphonella</i> collected from the reefs southwest of Magawish Island, Hurghada, Egypt                        | 2020 | HeLa ( <i>cervix</i> )<br>MCF-7 ( <i>breast</i> )<br>HeLa ( <i>cervix</i> )                                                                                                                                                                                                                                                                                                                    | Both human | 9.4<br>18.0<br>17.4                                                  | <sup>85</sup> |
| 18. | Bulbimidazoles A (Cpd. <b>453</b> )<br>Bulbimidazoles B (Cpd. <b>454</b> )<br>Bulbimidazoles C (Cpd. <b>465</b> )                                                                                                                                                                                                                                                                                                                                 | Alkanoyl imidazole | All novel  | Coral sample <i>Tubastraea</i> sp., collected as fishery waste near the coast of Minami-Ise, Mie, Japan,                                       | 2020 | P388 ( <i>murine leukemia</i> )                                                                                                                                                                                                                                                                                                                                                                | Murine     | 5.0<br>5.8<br>7.0                                                    | <sup>86</sup> |
| 19. | Shellmycin A (Cpd. <b>466</b> )<br><br>Shellmycin B (Cpd. <b>467</b> )                                                                                                                                                                                                                                                                                                                                                                            | Polyketides        | All novel  | <i>Streptomyces</i> sp. shell-016 isolated from the shell sediment of the Binzhou Shell Dike Island and Wetland National Nature Reserve, China | 2020 | A375 ( <i>malignant melanoma</i> )<br>H1299 ( <i>non-small cell lung cancer</i> )<br>HepG2 ( <i>Hepatocellular carcinoma</i> )<br>HT29 ( <i>colorectal adenocarcinoma</i> )<br>HCC1937 ( <i>breast cancer</i> )<br>A375 ( <i>malignant melanoma</i> )<br>H1299 ( <i>non-small cell lung cancer</i> )<br>HepG2 ( <i>Hepatocellular carcinoma</i> )<br>HT29 ( <i>colorectal adenocarcinoma</i> ) | All human  | 0.69<br>1.32<br>0.89<br>0.85<br>2.62<br>0.95<br>2.62<br>1.35<br>1.12 | <sup>87</sup> |

|  |                                 |  |  |  |  |                                             |      |  |
|--|---------------------------------|--|--|--|--|---------------------------------------------|------|--|
|  |                                 |  |  |  |  | HCC1937 ( <i>breast cancer</i> )            | 3.11 |  |
|  | Shellmycin C (Cpd. <b>468</b> ) |  |  |  |  | A375 ( <i>malignant melanoma</i> )          | 11.3 |  |
|  |                                 |  |  |  |  | HepG2 ( <i>Hepatocellular carcinoma</i> )   | 5.03 |  |
|  |                                 |  |  |  |  | HT29 ( <i>colorectal adenocarcinoma</i> )   | 4.33 |  |
|  |                                 |  |  |  |  | HCC1937 ( <i>breast cancer</i> )            | 12.6 |  |
|  | Shellmycin D (Cpd. <b>469</b> ) |  |  |  |  | A375 ( <i>malignant melanoma</i> )          | 0.78 |  |
|  |                                 |  |  |  |  | H1299 ( <i>non-small cell lung cancer</i> ) | 2.15 |  |
|  |                                 |  |  |  |  | HepG2 ( <i>Hepatocellular carcinoma</i> )   | 1.11 |  |
|  |                                 |  |  |  |  | HT29 ( <i>colorectal adenocarcinoma</i> )   | 1.02 |  |
|  |                                 |  |  |  |  | HCC1937 ( <i>breast cancer</i> )            | 2.89 |  |

**Table S4. The IC<sub>50</sub> of marine-derived lipids, sterols and steroids with anticancer activity**

| S/N | Isolated Compounds                                                                    | Class                                                 | Status<br>(Known<br>/Novel)                  | Source                                                                              | Year | Cancer cell line         | Source    | IC <sub>50</sub><br>(μM) | Ref. |
|-----|---------------------------------------------------------------------------------------|-------------------------------------------------------|----------------------------------------------|-------------------------------------------------------------------------------------|------|--------------------------|-----------|--------------------------|------|
| 1.  | 16β-acetoxy-3β,7β,11β-trihydroxyergost-5,22-diene and named penicisteroid E (Cpd.470) | Steroids (470, 483)<br>Steroids derivatives (474-488) | Novel<br>(470-474)<br><br>Known<br>(475-488) | Deep-sea-derived fungus <i>Penicillium granulatum</i> MCCC 3A00475 Antarctic Ocean. | 2019 | SHG-44 ( <i>glioma</i> ) | All human | 8.3                      | 88   |
|     | A549 ( <i>non-small cell lung</i> )                                                   |                                                       |                                              |                                                                                     |      | 5.5                      |           |                          |      |
|     | SHG-44 ( <i>glioma</i> )                                                              |                                                       |                                              |                                                                                     |      | 4.8                      |           |                          |      |
|     | Hep-G2 ( <i>liver</i> )                                                               |                                                       |                                              |                                                                                     |      | 6.7                      |           |                          |      |
|     | A549 ( <i>non-small cell lung</i> )                                                   |                                                       |                                              |                                                                                     |      | 8.0                      |           |                          |      |
|     | BIU-87 ( <i>liver</i> )                                                               |                                                       |                                              |                                                                                     |      | 14.4                     |           |                          |      |
|     | BEL-7402 ( <i>hepatoma</i> )                                                          |                                                       |                                              |                                                                                     |      | 8.5                      |           |                          |      |
|     | ECA-109 ( <i>oesophagus</i> )                                                         |                                                       |                                              |                                                                                     |      | 8.3                      |           |                          |      |
|     | Hela-S3 ( <i>cervix</i> )                                                             |                                                       |                                              |                                                                                     |      | 10.0                     |           |                          |      |
|     | Panc-1 ( <i>pancreas</i> )                                                            |                                                       |                                              |                                                                                     |      | 5.6                      |           |                          |      |
|     | Hep-G2 ( <i>liver</i> )                                                               |                                                       |                                              |                                                                                     |      | 7.0                      |           |                          |      |
|     | A549 ( <i>non-small cell lung</i> )                                                   |                                                       |                                              |                                                                                     |      | 4.4                      |           |                          |      |
|     | BIU-87 ( <i>liver</i> )                                                               |                                                       |                                              |                                                                                     |      | 8.5                      |           |                          |      |
|     | ECA-109 ( <i>oesophagus</i> )                                                         |                                                       |                                              |                                                                                     |      | 9.2                      |           |                          |      |
|     | Hela-S3 ( <i>cervix</i> )                                                             |                                                       |                                              |                                                                                     |      | 7.2                      |           |                          |      |
|     | SHG-44 ( <i>glioma</i> )                                                              |                                                       |                                              |                                                                                     |      | 12.5                     |           |                          |      |
|     | Hep-G2 ( <i>liver</i> )                                                               |                                                       |                                              |                                                                                     |      | 6.2                      |           |                          |      |
|     | A549 ( <i>non-small cell lung</i> )                                                   |                                                       |                                              |                                                                                     |      | 4.5                      |           |                          |      |
|     | BIU-87 ( <i>liver</i> )                                                               |                                                       |                                              |                                                                                     |      | 7.7                      |           |                          |      |
|     | BEL-7402 ( <i>hepatoma</i> )                                                          |                                                       |                                              |                                                                                     |      | 8.8                      |           |                          |      |
|     | ECA-109 ( <i>oesophagus</i> )                                                         |                                                       |                                              |                                                                                     |      | 4.1                      |           |                          |      |
|     | Hela-S3 ( <i>cervix</i> )                                                             |                                                       |                                              |                                                                                     |      | 4.8                      |           |                          |      |
|     | Panc-1 ( <i>pancreas</i> )                                                            |                                                       |                                              |                                                                                     |      | 4.2                      |           |                          |      |
|     | SHG-44 ( <i>glioma</i> )                                                              |                                                       |                                              |                                                                                     |      | 7.8                      |           |                          |      |
|     | HepG2 ( <i>liver</i> )                                                                |                                                       |                                              |                                                                                     |      | 4.4                      |           |                          |      |
|     | ECA-109 ( <i>oesophagus</i> )                                                         |                                                       |                                              |                                                                                     |      | 6.6                      |           |                          |      |
|     | Hela-S3 ( <i>cervix</i> )                                                             |                                                       |                                              |                                                                                     |      | 9.9                      |           |                          |      |
|     | Panc-1 ( <i>pancreas</i> )                                                            |                                                       |                                              |                                                                                     |      | 7.0                      |           |                          |      |
|     | A549 ( <i>non-small cell lung</i> )                                                   |                                                       |                                              |                                                                                     |      |                          |           |                          |      |
|     |                                                                                       |                                                       |                                              |                                                                                     |      |                          |           |                          |      |

|    |                                                                                                                                                                                                                                                                                                                                                                                                                     |                                   |            |                                                                                                                                                                     |      |                                                                                                                                                                                                                                                                                                                                           |            |                                                                                                                                                                        |               |
|----|---------------------------------------------------------------------------------------------------------------------------------------------------------------------------------------------------------------------------------------------------------------------------------------------------------------------------------------------------------------------------------------------------------------------|-----------------------------------|------------|---------------------------------------------------------------------------------------------------------------------------------------------------------------------|------|-------------------------------------------------------------------------------------------------------------------------------------------------------------------------------------------------------------------------------------------------------------------------------------------------------------------------------------------|------------|------------------------------------------------------------------------------------------------------------------------------------------------------------------------|---------------|
|    | <div>3<math>\beta</math>,5<math>\alpha</math>,6<math>\beta</math>,22<math>E</math>)-6-methoxyergosta-7,22-diene-3,5-diol (Cpd. <b>481</b>)</div> <div>5<math>\alpha</math>,6<math>\alpha</math>,8<math>\alpha</math>,9<math>\alpha</math>-diepoxy-(22<math>E</math>,24<math>R</math>)-ergost-22-ene-3<math>\beta</math>,7<math>\beta</math>-diol (Cpd. <b>482</b>)</div> <div>Incisterol A2 (Cpd. <b>488</b>)</div> |                                   |            |                                                                                                                                                                     |      | <div>ECA-109 (oesophagus)</div> <div>A549 (non-small cell lung)</div> <div>BIU-87 (liver)</div> <div>BEL-7402 (bladder)</div> <div>Panc-1 (pancreas)</div> <div>ECA-109 (oesophagus)</div> <div>Hela-S3 (cervix)</div> <div>HepG2 (liver)</div> <div>BEL-7402 (bladder)</div> <div>ECA-109 (oesophagus)</div> <div>Hela-S3 (cervix)</div> |            | <div>5.9</div> <div>15.6</div> <div>7.0</div> <div>8.7</div> <div>8.0</div> <div>6.3</div> <div>7.1</div> <div>9.8</div> <div>16.6</div> <div>7.9</div> <div>7.5</div> |               |
| 2. | <div>2-hydroxyl-3-pyrenocine-thio propanoic acid (Cpd. <b>503</b>)</div> <div>5,5-dichloro-1-(3,5-dimethoxyphenyl)-1,4-dihydropentan-2-one (Cpd. <b>506</b>)</div>                                                                                                                                                                                                                                                  | Polysulfated steroids             | Both novel | <i>Penicillium citreonigrum</i> XT20-134 (MCCC 3A00956) isolated from southeast Indian Ocean sediments                                                              | 2019 | <div>Bel7402 (Hepatoma tumor cell)</div> <div>HT1080 (Fibrosarcoma tumor cell)</div> <div>Bel-7402 (hepatoma)</div> <div>HT1080 (Fibrosarcoma tumor cell)</div>                                                                                                                                                                           | All Human  | <div>7.63</div> <div>13.14</div> <div>10.22</div> <div>16.53</div>                                                                                                     | <sup>89</sup> |
| 3. | <div>(24<math>S</math>)-ergosta-5,25-diene-3 &lt; <math>\beta</math> &gt; ,20,24,28-tetro l (Cpd. <b>526</b>)</div> <div>1<math>\alpha</math>,3<math>\beta</math>-dihydroxyergosta-5,24(28)-dien-7<math>\beta</math>-yl acetate (Cpd. <b>528</b>)</div>                                                                                                                                                             | Oxygenated ergostane-type sterols | Novel      | Isolated from the soft coral <i>Sinularia</i> sp. collected from the water area near the Xisha Islands, South China Sea                                             | 2019 | <div>MDA-MB-436 (breast)</div> <div>H157 (buccal mucosa)</div> <div>MDA-MB-436</div> <div>Hep3B (hepatic)</div> <div>HT-29 (colorectal)</div>                                                                                                                                                                                             | Both human | <div>17.5</div> <div>10.17</div> <div>18.14</div> <div>19.30</div> <div>10.38</div>                                                                                    | <sup>90</sup> |
| 4. | Eburicol (Cpd. <b>529</b> )                                                                                                                                                                                                                                                                                                                                                                                         | Steroid                           | known      | Marine-derived fungi <i>Rhizopus</i> sp isolated from shellfish farming areas of the French Atlantic west coast                                                     | 2019 | <div>MCF-7 (breast)</div> <div>MDA-MB-231 (breast)</div>                                                                                                                                                                                                                                                                                  | Both human | <div>2.0</div> <div>15.7</div>                                                                                                                                         | <sup>91</sup> |
| 5. | Dokdolipid B (Cpd. <b>531</b> )                                                                                                                                                                                                                                                                                                                                                                                     | Hydroxylated rhamnolipids         | Novel      | Bacterial strain 179DD-027 ( <i>Actinoboloteichus hymeniacidonis</i> ) isolated from a sediment sample, collected off the coasts of Dokdo island, Republic of Korea | 2019 | <div>HCT-15 (colon)</div> <div>NUGC-3 (stomach)</div> <div>NCI-H23 (lung)</div> <div>ACHN (renal)</div> <div>PC-3(prostate)</div>                                                                                                                                                                                                         | All human  | <div>16.7</div> <div>19.3</div> <div>13.7</div> <div>14.1</div> <div>18.2</div>                                                                                        | <sup>92</sup> |

**Table S5. The IC<sub>50</sub> of marine-derived ketones, quinines, quinolones and xanthenes with anticancer activity**

| S/N | Isolated Compounds                                                                                                                                                                      | Class                                                                       | Status (Known /Novel) | Source                                                                                                                                                                                                                            | Year | Cancer cell line                                                                   | Source         | IC <sub>50</sub> (μM)                    | Ref. |
|-----|-----------------------------------------------------------------------------------------------------------------------------------------------------------------------------------------|-----------------------------------------------------------------------------|-----------------------|-----------------------------------------------------------------------------------------------------------------------------------------------------------------------------------------------------------------------------------|------|------------------------------------------------------------------------------------|----------------|------------------------------------------|------|
| 1.  | 3-methyl-antibiotic G-15F (Cpd. <b>535</b> )                                                                                                                                            | Medermycin derivative                                                       | Known                 | <i>Streptomyces</i> sp. SS17A (from marine sediments of Shengsi Island (Zhejiang province, China))                                                                                                                                | 2019 | PC-3 (prostate)<br>HCT-116 (colorectal)                                            | Human<br>Human | 0.02<br>0.04                             | 93   |
| 2.  | Peniquinone A (Cpd. <b>541</b> )<br><br>Peniquinone B (Cpd. <b>543</b> )                                                                                                                | 1,4-benzoquinone (Aromatic)                                                 | Novel                 | Marine-derived fungus <i>Penicillium</i> sp. L129 from rhizosphere-soil of <i>Limonium sinense</i> (Girald) Kuntze collected in Yangkou Beach in Qingdao, China                                                                   | 2019 | MCF-7 (breast)<br>U87 (glioma)<br>PC3 (prostate)<br>U87 (glioma)<br>PC3 (prostate) | All<br>Human   | 12.39<br>9.01<br>14.59<br>13.45<br>19.93 | 94   |
| 3.  | Lithocarol A (Cpd. <b>558</b> )<br>Lithocarol B (Cpd. <b>559</b> )<br>Lithocarol D (Cpd. <b>561</b> )                                                                                   | Poly-ketal derivatives in tenellone family ketones                          | Novel                 | Marine-derived fungus <i>Phomopsis lithocarpus</i> FS508 Deep-sea sediment from Indian Ocean                                                                                                                                      | 2019 | MCF-7 (breast)<br>A549 (lung)<br>MCF-7m (breast)<br>HepG2 (liver)<br>A549 (lung)   | Human          | 19.2<br>10.5<br>14.8<br>18.5<br>15.1     | 95   |
| 4.  | Suberosanone B (Cpd. <b>567</b> )                                                                                                                                                       | Bicyclic lactone                                                            | Known                 | Octocoral <i>Dendronephthya mucronata</i> collected near Phu Quoc Island, Kiengiang, Vietnam                                                                                                                                      | 2019 | HeLa (cervical adenocarcinoma)                                                     | Human          | 14.45                                    | 96   |
| 5.  | O-Demethylsterigmatocystin (Cpd. <b>586</b> )<br>Sterigmatocystin (Cpd. <b>587</b> )<br>Sterigmatin (Cpd. <b>588</b> )<br>AGI-B4 (Cpd. <b>589</b> )<br>Stephacidin A (Cpd. <b>594</b> ) | Xanthone derivatives (Cpds. <b>586-589</b> )<br>Alkaloid (Cpd. <b>594</b> ) | Known                 | Marine-derived fungus <i>Aspergillus versicolor</i> (code F8.1.3a) isolated from the sponge <i>Agelas oroides</i> , which was collected from Aliaga-İzmir, Turkey co-cultured with <i>Bacillus subtilis</i> lab strain 168 trpC2. | 2019 | L5178Y (lymphoma)                                                                  | Mouse          | 5.8<br><br>2.2<br>2.3<br>2.0<br>16.7     | 97   |
| 6.  | ULDF4 (kigamicin) (Cpd. <b>603</b> )<br>ULDF5 (staurosporine) (Cpd. <b>604</b> )                                                                                                        | Xanthone<br>Indolocarbazole                                                 | Both known            | <i>Strptomyces. bingchengensis</i> sediment samples collected from Folawiyo, Iddo in Lagos Lagoon, Nigeria                                                                                                                        | 2019 | HeLa (cervical adenocarcinoma)                                                     | Human          | 0.11<br>0.24                             | 98   |

**Table S6. The IC<sub>50</sub> of other marine-derived compounds with anticancer activity**

| S/N | Isolated Compounds | Class | Status | Source | Year | Cancer Cell line | Source | IC <sub>50</sub> (μM) | Ref. |
|-----|--------------------|-------|--------|--------|------|------------------|--------|-----------------------|------|
|-----|--------------------|-------|--------|--------|------|------------------|--------|-----------------------|------|

|    |                                                                     |                                                                                                                                                   | (Known<br>/Novel)                                                             |                                                                                                                                                  |      |                                                                                                                                                    |                           |                         |     |
|----|---------------------------------------------------------------------|---------------------------------------------------------------------------------------------------------------------------------------------------|-------------------------------------------------------------------------------|--------------------------------------------------------------------------------------------------------------------------------------------------|------|----------------------------------------------------------------------------------------------------------------------------------------------------|---------------------------|-------------------------|-----|
| 1. | 7-oxo-holyrin A (Cpd. <b>605</b> )                                  | Staurosporine derivatives<br>Indololcarbazoles                                                                                                    | Novel<br>(Cpds<br><b>605-610</b> )<br><br>Known<br>(Cpds.<br><b>611-619</b> ) | <i>Streptomyces</i> sp. NB-A13 (from<br>marine sediments of Ningbo City,<br>Zhejiang province, China)                                            | 2019 | PC-3 ( <i>prostate</i> )<br>SW-620 ( <i>colon</i> )                                                                                                | Both<br>human             | 4.03<br>2.14            | 99  |
|    | 4'-N-formyl-7-oxo-holyrin A (Cpd.<br><b>606</b> )                   |                                                                                                                                                   |                                                                               |                                                                                                                                                  |      | PC-3 ( <i>prostate</i> )<br>SW-620 ( <i>colon</i> )                                                                                                |                           | 2.05<br>0.74            |     |
|    | 3'-(hydroxyl(oxiran-2-yl)methoxy)-<br>holyrine A (Cpd. <b>607</b> ) |                                                                                                                                                   |                                                                               |                                                                                                                                                  |      | PC-3 ( <i>prostate</i> )<br>SW-620 ( <i>colon</i> )                                                                                                |                           | 2.45<br>2.00            |     |
|    | 3'-epi-5'-methoxy-K252d (Cpd. <b>608</b> )                          |                                                                                                                                                   |                                                                               |                                                                                                                                                  |      | PC-3 ( <i>prostate</i> )<br>SW-620 ( <i>colon</i> )                                                                                                |                           | 16.60<br>9.54           |     |
|    | 7-oxo-MLR-52 (Cpd. <b>609</b> )                                     |                                                                                                                                                   |                                                                               |                                                                                                                                                  |      | PC-3 ( <i>prostate</i> )<br>SW-620 ( <i>colon</i> )                                                                                                |                           | 0.55<br>0.16            |     |
|    | RK-1409 (Cpd. <b>611</b> )                                          |                                                                                                                                                   |                                                                               |                                                                                                                                                  |      | SW-620 ( <i>colon</i> )                                                                                                                            |                           | 0.010                   |     |
|    | Holyrine A (Cpd. <b>612</b> )                                       |                                                                                                                                                   |                                                                               |                                                                                                                                                  |      | PC-3 ( <i>prostate</i> )<br>SW-620 ( <i>colon</i> )                                                                                                |                           | 2.06<br>0.76            |     |
|    | 3'-N-formyl-holyrin A (Cpd. <b>613</b> )                            |                                                                                                                                                   |                                                                               |                                                                                                                                                  |      | PC-3 ( <i>prostate</i> )<br>SW-620 ( <i>colon</i> )                                                                                                |                           | 2.50<br>0.73            |     |
|    | MLR-52 (Cpd. <b>614</b> )                                           |                                                                                                                                                   |                                                                               |                                                                                                                                                  |      | PC-3 ( <i>prostate</i> )<br>SW-620 ( <i>colon</i> )                                                                                                |                           | 0.56<br>0.18            |     |
|    | k252d (Cpd. <b>615</b> )                                            |                                                                                                                                                   |                                                                               |                                                                                                                                                  |      | PC-3 ( <i>prostate</i> )<br>SW-620 ( <i>colon</i> )                                                                                                |                           | 1.87<br>1.04            |     |
|    | 7-oxo-k252d (Cpd. <b>616</b> )                                      |                                                                                                                                                   |                                                                               |                                                                                                                                                  |      | PC-3 ( <i>prostate</i> )<br>SW-620 ( <i>colon</i> )                                                                                                |                           | 2.27<br>0.81            |     |
|    | 3'-demethy-RK-1409 (Cpd. <b>617</b> )                               |                                                                                                                                                   |                                                                               |                                                                                                                                                  |      | PC-3 ( <i>prostate</i> )<br>SW-620 ( <i>colon</i> )                                                                                                |                           | 0.67<br>0.49            |     |
|    | 252a-Me (Cpd. <b>619</b> )                                          |                                                                                                                                                   |                                                                               |                                                                                                                                                  |      | PC-3 ( <i>prostate</i> )<br>SW-620 ( <i>colon</i> )                                                                                                |                           | 0.77<br>0.02            |     |
| 2. | Altercrasin B (Cpd. <b>621</b> )                                    | Decalin derivatives                                                                                                                               | All<br>novel                                                                  | <i>Alternaria</i> sp. OUPS-117D-1 was<br>isolated from the sea urchin<br><i>Anthocidaris Ccrassipana</i> , collected<br>in Osaka bay, Japan      | 2019 | P388 ( <i>lukaemia</i> )<br>HL-60 ( <i>lukaemia</i> )<br>L1210I ( <i>leukaemia</i> )                                                               | Murine<br>Human<br>Murine | 20.0<br>12.1<br>8.0     | 100 |
|    | Altercrasin D (Cpd. <b>623</b> )                                    |                                                                                                                                                   |                                                                               |                                                                                                                                                  |      | P388 ( <i>lukaemia</i> )<br>HL-60 ( <i>lukaemia</i> )<br>L1210I ( <i>leukaemia</i> )                                                               |                           | 9.7<br>6.1<br>8.4       |     |
|    | Altercrasin E (Cpd. <b>624</b> )                                    |                                                                                                                                                   |                                                                               |                                                                                                                                                  |      | P388 ( <i>lukaemia</i> )<br>HL-60 ( <i>lukaemia</i> )<br>L1210I ( <i>leukaemia</i> )                                                               |                           | 15.5<br>6.2<br>10.3     |     |
|    |                                                                     |                                                                                                                                                   |                                                                               |                                                                                                                                                  |      |                                                                                                                                                    |                           |                         |     |
| 3. | Nocarterphenyl A (Cpd. <b>625</b> )                                 | Benzothiazole containing -<br>(Cpd. <b>630</b> only) p-terphenyls<br>and its derivatives (Cpds. <b>633</b> –<br><b>635</b> ) aromatic hydrocarbon | Novel                                                                         | Marine-Derived actinobacterial<br>strain <i>Nocardiopsis</i> Sp. OUCMDZ-<br>4936 from Dongzhaigang Mangrove<br>Reserve, Hainan Province of China | 2019 | HL60 ( <i>leukaemia</i> )<br>HCC1954 ( <i>ductal carcinoma of the<br/>breast cells</i> )<br>MDA-MB-468<br>( <i>triple negative breast cancer</i> ) | All<br>Human              | 0.38<br>0.10<br><br>2.8 | 101 |
|    |                                                                     |                                                                                                                                                   |                                                                               |                                                                                                                                                  |      |                                                                                                                                                    |                           |                         |     |

|  |                                                                           |  |                              |  |  |                                                                                                                                                                                                                                                                                                                                                                                                                                                                            |  |                                                                                          |  |
|--|---------------------------------------------------------------------------|--|------------------------------|--|--|----------------------------------------------------------------------------------------------------------------------------------------------------------------------------------------------------------------------------------------------------------------------------------------------------------------------------------------------------------------------------------------------------------------------------------------------------------------------------|--|------------------------------------------------------------------------------------------|--|
|  |                                                                           |  |                              |  |  | H2228 ( <i>lung</i> )<br>MV4-11 (( <i>TLT3-activated AML cells</i> )<br>K562 ( <i>chronic myelogenous leukaemia</i> )<br>A549 ( <i>lung</i> )<br>BT474 ( <i>hormone sensitive breast cancer</i> )<br>A431( <i>epidermoid</i> )<br>MCF-7 ( <i>breast</i> )<br>143B ( <i>epidermoid carcinoma</i> )                                                                                                                                                                          |  | 1.7<br>4.0<br>9.0<br>7.8<br>6.0<br>4.6<br>18.0<br>5.5                                    |  |
|  | 5-methoxy-4,7-bis(4-methoxyphenyl)benzo[d]thiazol-6-ol (Cpd. <b>628</b> ) |  | Known (Cpds <b>628-630</b> ) |  |  | K562 ( <i>chronic myelogenous leukaemia</i> )<br>549 ( <i>lung</i> )<br>MCF-7 ( <i>breast</i> )<br>P6C ( <i>CD44<sup>+</sup> colorectal stem cell line</i> )                                                                                                                                                                                                                                                                                                               |  | 0.77<br>5.1<br>6.0<br>9.4                                                                |  |
|  | 2,4',4''-trimethoxyp-terphenyl-3,6-dione (Cpd. <b>629</b> )               |  |                              |  |  | MV4-11 (( <i>TLT3-activated AML cells</i> )<br>A549 ( <i>lung</i> )<br>HL60 ( <i>leukaemia</i> )<br>MKN-45 ( <i>gastric</i> )<br>N-87 ( <i>gastric carcinoma</i> )<br>A673 ( <i>rhabdomyoma cell line</i> )<br>K562 ( <i>chronic myelogenous leukaemia</i> )<br>BT474 ( <i>hormone sensitive breast cancer</i> )<br>H1229 ( <i>non-small cell lung carcinoma</i> )<br>HUCCT1( <i>bile duct carcinoma</i> )<br>B16F10 ( <i>highly metastatic mouse melanoma cell line</i> ) |  | 0.16<br>0.48<br>0.17<br>0.49<br>1.0<br>0.76<br>4.8<br>3.6<br>0.72<br>0.20<br>0.76<br>1.1 |  |

|  |                                                               |  |  |  |                                                             |          |  |
|--|---------------------------------------------------------------|--|--|--|-------------------------------------------------------------|----------|--|
|  |                                                               |  |  |  | MDA-MB-468<br>(triple negative<br>breast cancer)            | 3.1      |  |
|  |                                                               |  |  |  | H-1975 (lung)                                               | 4.7      |  |
|  |                                                               |  |  |  | U251MG<br>(glioblastoma)                                    | 0.48     |  |
|  |                                                               |  |  |  | HCC1954 (ductal<br>carcinoma of the<br>breast cells)        | 0.52     |  |
|  |                                                               |  |  |  | DU145 (prostate)                                            | 2.0      |  |
|  |                                                               |  |  |  | SPC-A1 (lung cancer<br>over expressing<br>maspin cell line) | 1.9      |  |
|  |                                                               |  |  |  | HCT-116<br>(colorectal)                                     | 5.0      |  |
|  |                                                               |  |  |  | 143B (epidermoid<br>carcinoma)                              | 0.94     |  |
|  |                                                               |  |  |  | H2228 (lung)                                                | 2.0      |  |
|  |                                                               |  |  |  | MDA-MB-231<br>(breast)                                      | 0.77     |  |
|  | 2,3,4',4''-tetramethoxy-pterphenyl-6-ol<br>(Cpd. <b>630</b> ) |  |  |  | MV4-11 ((TLT3-<br>activated AML cells)                      | 0.67     |  |
|  |                                                               |  |  |  | MDA-MB-468<br>(triple negative<br>breast cancer)            | 1.0      |  |
|  |                                                               |  |  |  | DU145 (prostate)                                            | 8.9      |  |
|  |                                                               |  |  |  | A673 (rhabdomyoma<br>cell line)                             | 8.9      |  |
|  |                                                               |  |  |  | K562 (leukaemia)                                            | 9.7      |  |
|  |                                                               |  |  |  | A549 (lung)                                                 | 4.4      |  |
|  |                                                               |  |  |  | H1975 (lung)                                                | 5.0      |  |
|  |                                                               |  |  |  | HL-60 (leukaemia)                                           | 2.0      |  |
|  |                                                               |  |  |  | HCC1954 (ductal<br>carcinoma<br>of the breast cells)        | 17<br>12 |  |
|  |                                                               |  |  |  | MCF-7 (breast)                                              | 1.0      |  |
|  |                                                               |  |  |  | MKN-45 (gastric)                                            | 9.8      |  |
|  |                                                               |  |  |  | DU145 (prostate)                                            |          |  |
|  |                                                               |  |  |  | SPC-A1 (lung cancer<br>over expressing<br>maspin cell line) |          |  |
|  |                                                               |  |  |  | 143B (lung cancer<br>over expressing<br>maspin cell line)   | 7.7      |  |
|  |                                                               |  |  |  | H2228 (lung)                                                |          |  |

|    |                                      |                      |            |                                                                                                                                                        |      |                                                            |            |            |     |
|----|--------------------------------------|----------------------|------------|--------------------------------------------------------------------------------------------------------------------------------------------------------|------|------------------------------------------------------------|------------|------------|-----|
|    |                                      |                      |            |                                                                                                                                                        |      | MDB-MB-231<br>(breast)                                     |            | 5.0<br>2.0 |     |
| 4. | Terrosamycins A (Cpd. 631)           | Polycyclic polyether | Both novel | <i>Streptomyces</i> sp. RKND004 isolated from Prince Edward Island sediment                                                                            | 2019 | HTB-26 (breast adenocarcinoma)                             | Both human | 10.1       | 102 |
|    | Terrosamycins B (Cpd. 632)           |                      |            |                                                                                                                                                        |      | MCF-7 (breast)                                             |            | 6.0        |     |
|    |                                      |                      |            |                                                                                                                                                        |      | HTB-26 (breast adenocarcinoma)                             |            | 6.0        |     |
|    |                                      |                      |            |                                                                                                                                                        |      | MCF-7 (breast)                                             |            | 3.9        |     |
| 5. | Oxadiazine Nocuoilin A (Cpd. 633)    | Azoles               | known      | Cyanobacterial strain LEGE 06071 from the LEGE CC culture (26) of CIIMAR, Porto, Portugal                                                              | 2019 | HCT116 (colon)                                             | Both human | 1.35       | 104 |
|    |                                      |                      |            |                                                                                                                                                        |      | hTERT RPE-1 (immortalized epithelial cell line)            |            | 1.20       |     |
| 6. | Psolusoside L (Cpd. 638)             | Glycoside            | Both novel | Sea cucumber <i>Psolus fabricii</i> (family Psolidae; order Dendrochirotid) were collected in the Sea of Okhotsk near Onkotan Island (Kurile Islands). | 2019 | Ehrlich ascites carcinoma (liver)                          | All mouse  | 9.73       | 106 |
|    | Psolusoside N (Cpd. 640)             |                      |            |                                                                                                                                                        |      | Neuro-2A (neuroblastoma)                                   |            | 10.60      |     |
|    |                                      |                      |            |                                                                                                                                                        |      | Neuro-2A                                                   |            | 13.52      |     |
| 7. | Terphenyllin (Cpd. 646)              | <i>p</i> -terphenyls | Both known | Deep-sea-derived fungus <i>Aspergillus candidus</i> isolated from Atlantic Ocean                                                                       | 2019 | HeLa (cervix)                                              | All human  | 9.2        | 107 |
|    | Prenylterphenyllin (Cpd. 647)        |                      |            |                                                                                                                                                        |      | ECA-109 (oesophagus)                                       |            | 7.0        |     |
|    |                                      |                      |            |                                                                                                                                                        |      | Bel-7402 (hepatoma)                                        |            | 9.4        |     |
|    |                                      |                      |            |                                                                                                                                                        |      | Panc-1 (pancreas)                                          |            | 7.8        |     |
|    |                                      |                      |            |                                                                                                                                                        |      | HeLa (cervix)                                              |            | 5.6        |     |
|    |                                      |                      |            |                                                                                                                                                        |      | ECA-109 (oesophagus)                                       |            | 5.5        |     |
|    |                                      |                      |            |                                                                                                                                                        |      | Bel-7402 (hepatoma)                                        |            | 8.5        |     |
|    |                                      |                      |            |                                                                                                                                                        |      | Panc-1 (pancreas)                                          |            | 7.7        |     |
| 8. | Oxalicumone A (Cpd. 656)             | Dihydrothiophene     | Known      | Fungus <i>Aspergillus</i> sp. LS34 isolated from sponge <i>Haliclona</i> sp. collected at Lingshui, Hainan Province, China                             | 2019 | CCRF-CEM (human acute lymphoblastic leukemia T lymphocyte) | Both human | 1.22       | 108 |
|    |                                      |                      |            |                                                                                                                                                        |      | K562 (chronic myeloid leukemia)                            |            | 10.58      |     |
| 9. | Holothurin A <sub>2</sub> (Cpd. 659) | Triterpene Glycoside | All known  | Sea cucumber <i>Holothuria (Halodeima) edulis</i> Lesson, 1830 collected from Cu Lao Cham Island, Quangnam, Vietnam                                    | 2019 | LNCaP (prostate)                                           | All human  | 0.96       | 109 |
|    | Holothurin A (Cpd. 663)              |                      |            |                                                                                                                                                        |      | HepG2 (liver)                                              |            | 0.76       |     |
|    |                                      |                      |            |                                                                                                                                                        |      | KB (epidermoid carcinoma)                                  |            | 0.75       |     |
|    |                                      |                      |            |                                                                                                                                                        |      | MCF-7 (breast)                                             |            | 0.81       |     |
|    |                                      |                      |            |                                                                                                                                                        |      | SK-MEL-2 (skin)                                            |            | 0.84       |     |
|    |                                      |                      |            |                                                                                                                                                        |      | LNCaP (prostate)                                           |            | 1.30       |     |
|    |                                      |                      |            |                                                                                                                                                        |      | HepG2 (liver)                                              |            | 2.03       |     |
|    |                                      |                      |            |                                                                                                                                                        |      | KB (epidermoid carcinoma)                                  |            | 1.79       |     |
|    |                                      |                      |            |                                                                                                                                                        |      | MCF-7 (breast)                                             |            | 2.29       |     |

27

|     |                                                                                                                                                      |                                          |                |                                                                                                                                                                                     |      |                                                                                                                                                                                  |            |                                                                |     |
|-----|------------------------------------------------------------------------------------------------------------------------------------------------------|------------------------------------------|----------------|-------------------------------------------------------------------------------------------------------------------------------------------------------------------------------------|------|----------------------------------------------------------------------------------------------------------------------------------------------------------------------------------|------------|----------------------------------------------------------------|-----|
|     | Prenylcandidusin G (Cpd. 679)                                                                                                                        |                                          |                |                                                                                                                                                                                     |      | HeLa (cervix)<br>K562 (leukemic)<br>MGC-803 (Gastric)<br>HCT-116 (colorectal)<br>BEL7402 (hepatoma)<br>A549 (lung)<br>SH-SY5Y (Neuroblast)<br>HeLa (cervix)<br>HL-60 (leukaemia) |            | 8.5<br>15.9<br>1.4<br>0.9<br>16.0<br>2.8<br>2.2<br>10.1<br>3.4 |     |
| 13. | Monarubin B (Cpd. 683)<br>Lunatinin (Cpd. 686)                                                                                                       | Isocoumarin                              | Novel<br>Known | Marine fungus <i>Monascus ruber</i> BB5 isolated from <i>Meretrix meretrix</i> collected from Hailing Island, Yangjiang, China                                                      | 2020 | HepG-2 (liver)<br>QGY77011 (liver)<br>HepG-2 (liver)<br>QGY77011 (liver)                                                                                                         | Both human | 1.72<br>0.71<br>9.60<br>7.12                                   | 113 |
| 14. | Meleagrins (Cpd. 693)                                                                                                                                | Unknown                                  | Novel          | Fungal strain <i>Emericella dentata</i> Nq45 was isolated from sediment sample obtained from the sea water of Nabq bay, Red Sea, Egypt                                              | 2020 | KB-3-1 (cervix carcinoma)<br>KB-V1 (multidrug resistant sub-clone of KB-3-1)                                                                                                     | Both human | 3.07<br>6.07                                                   | 114 |
| 15. | 5,5'-oxybis(1-methoxy-3-methylbenzene) (Cpd. 711)<br>4'-[(2-Hydroxy-1,3-propanedilyl)bis[oxy-4,1-phenylene(1-methylethylidene)]]bisphenol (Cpd. 722) | Aromatic compounds                       | Both Known     | Marine fungus <i>Trichoderma erinaceum</i> F1-1 isolated from inner tissue of the sea star <i>Acanthaster planci</i> collected from Hainan Sanya National Coral Reef Reserve, China |      | MDA-MB-435 (melanocyte)<br>A549 (lung)                                                                                                                                           | Both human | 12.5<br>18.4                                                   | 115 |
| 16. | Pyrenosetins A (Cpd. 725)<br>Pyrenosetins B (Cpd. 726)                                                                                               | Decalinoylspirotetramic acid derivatives | Both novel     | Fungal strain isolated from brown alga <i>Fucus vesiculosus</i> specimens collected in Falckenstein Beach Kiel Fjord, Baltic Sea, Germany                                           | 2020 | A-375 (malignant melanoma)                                                                                                                                                       | Human      | 2.8<br>6.3                                                     | 116 |
| 17. | Donghaecyclinones C (Cpd. 731)                                                                                                                       | Angucyclinone                            | Novel          | <i>Streptomyces</i> sp. strain SUD119, which was isolated from a marine sediment sample collected from a volcanic island in Korea                                                   | 2020 | HCT116 (colorectal)<br>MDA-MB231 (breast)<br>SNU638 (gastric)<br>A549 (lung)<br>SK-HEP1 (liver)                                                                                  | All human  | 8.0<br>6.7<br>9.5<br>9.6<br>6.0                                | 117 |
